# Supplementary material
Source: publisher figshare collection journal article supplement (https://sage.figshare.com/ndownloader/files/23742553)
Supplement: Supplementary file 1 [file 23742553]

## Sheet: DATA
cnty_fips	cnty_name	st	state	hospitals_in_cost_reports	Hospitals_in_HC	all_icu	Total_pop	60plus	60plus_pct	60plus_per_each_icu_bed
01001	Autauga	AL	Alabama	1	1	6	55036	10523	0.191	1754
01003	Baldwin	AL	Alabama	3	3	51	203360	53519	0.263	1049
01005	Barbour	AL	Alabama	1	1	5	26201	6150	0.235	1230
01007	Bibb	AL	Alabama	1	1	0	22580	4773	0.211
01009	Blount	AL	Alabama	1	1	6	57667	13600	0.236	2267
01011	Bullock	AL	Alabama	1	1	0	10478	2371	0.226
01013	Butler	AL	Alabama	1	1	7	20126	5151	0.256	736
01015	Calhoun	AL	Alabama	2	2	24	115527	27115	0.235	1130
01017	Chambers	AL	Alabama	0	0	0	33895	8501	0.251
01019	Cherokee	AL	Alabama	1	1	0	25855	7513	0.291
01021	Chilton	AL	Alabama	1	1	6	43805	9429	0.215	1572
01023	Choctaw	AL	Alabama	1	1	0	13188	3759	0.285
01025	Clarke	AL	Alabama	2	2	0	24625	6134	0.249
01027	Clay	AL	Alabama	1	1	4	13407	3480	0.26	870
01029	Cleburne	AL	Alabama	0	0	0	14939	3691	0.247
01031	Coffee	AL	Alabama	1	1	7	51073	11027	0.216	1575
01033	Colbert	AL	Alabama	2	2	22	54435	14062	0.258	639
01035	Conecuh	AL	Alabama	1	1	0	12649	3542	0.28
01037	Coosa	AL	Alabama	0	0	0	10955	3145	0.287
01039	Covington	AL	Alabama	2	2	13	37519	10290	0.274	792
01041	Crenshaw	AL	Alabama	1	1	0	13866	3371	0.243
01043	Cullman	AL	Alabama	1	1	12	81703	19667	0.241	1639
01045	Dale	AL	Alabama	1	1	6	49393	10498	0.213	1750
01047	Dallas	AL	Alabama	1	1	18	40755	9436	0.232	524
01049	DeKalb	AL	Alabama	1	1	12	71194	15782	0.222	1315
01051	Elmore	AL	Alabama	2	2	5	80989	15929	0.197	3186
01053	Escambia	AL	Alabama	2	2	14	37621	8677	0.231	620
01055	Etowah	AL	Alabama	2	2	56	103132	25122	0.244	449
01057	Fayette	AL	Alabama	2	2	12	16657	4604	0.276	384
01059	Franklin	AL	Alabama	2	2	7	31507	7054	0.224	1008
01061	Geneva	AL	Alabama	1	1	6	26572	6716	0.253	1119
01063	Greene	AL	Alabama	1	1	0	8533	2352	0.276
01065	Hale	AL	Alabama	1	1	0	14995	3945	0.263
01067	Henry	AL	Alabama	0	0	0	17110	4834	0.283
01069	Houston	AL	Alabama	2	2	66	104108	23474	0.225	356
01071	Jackson	AL	Alabama	1	1	10	52326	13441	0.257	1344
01073	Jefferson	AL	Alabama	8	8	471	659460	138161	0.21	293
01075	Lamar	AL	Alabama	0	0	0	14021	3811	0.272
01077	Lauderdale	AL	Alabama	1	1	48	92590	23452	0.253	489
01079	Lawrence	AL	Alabama	1	1	6	33288	7710	0.232	1285
01081	Lee	AL	Alabama	1	1	28	156597	24513	0.157	875
01083	Limestone	AL	Alabama	1	1	10	91695	18399	0.201	1840
01085	Lowndes	AL	Alabama	0	0	0	10362	2481	0.239
01087	Macon	AL	Alabama	0	0	0	19358	4854	0.251
01089	Madison	AL	Alabama	2	2	100	353213	70040	0.198	700
01091	Marengo	AL	Alabama	1	1	5	19743	5124	0.26	1025
01093	Marion	AL	Alabama	1	1	4	30058	8196	0.273	2049
01095	Marshall	AL	Alabama	1	1	20	94738	21466	0.227	1073
01097	Mobile	AL	Alabama	4	4	157	414328	88103	0.213	561
01099	Monroe	AL	Alabama	1	1	8	21745	5536	0.255	692
01101	Montgomery	AL	Alabama	3	3	88	227120	44214	0.195	502
01103	Morgan	AL	Alabama	1	1	34	119157	26739	0.224	786
01105	Perry	AL	Alabama	0	0	0	9680	2278	0.235
01107	Pickens	AL	Alabama	1	1	4	20170	4974	0.247	1244
01109	Pike	AL	Alabama	1	1	9	33287	6441	0.193	716
01111	Randolph	AL	Alabama	0	1	0	22530	6129	0.272
01113	Russell	AL	Alabama	1	1	8	58480	10680	0.183	1335
01115	St. Clair	AL	Alabama	1	1	6	86937	18943	0.218	3157
01117	Shelby	AL	Alabama	1	1	32	208721	41610	0.199	1300
01119	Sumter	AL	Alabama	1	1	0	13084	3005	0.23
01121	Talladega	AL	Alabama	2	2	14	80888	18842	0.233	1346
01123	Tallapoosa	AL	Alabama	2	2	6	40756	11006	0.27	1834
01125	Tuscaloosa	AL	Alabama	1	1	84	204424	36426	0.178	434
01127	Walker	AL	Alabama	1	1	12	64927	16386	0.252	1366
01129	Washington	AL	Alabama	1	1	0	16746	4103	0.245
01131	Wilcox	AL	Alabama	1	1	0	10919	2751	0.252
01133	Winston	AL	Alabama	1	1	4	23968	6575	0.274	1644
02013	Aleutians East	AK	Alaska	0	0	0	3338	510	0.153
02016	Aleutians West	AK	Alaska	0	0	0	5784	707	0.122
02020	Anchorage	AK	Alaska	3	3	73	298225	43608	0.146	597
02050	Bethel	AK	Alaska	1	1	0	17957	2082	0.116
02060	Bristol Bay	AK	Alaska	0	0	0	917	164	0.179
02068	Denali	AK	Alaska	0	0	0	2303	481	0.209
02070	Dillingham	AK	Alaska	1	1	0	4974	701	0.141
02090	Fairbanks North Star	AK	Alaska	1	1	13	100031	13950	0.139	1073
02100	Haines	AK	Alaska	0	0	0	2537	727	0.287
02105	Hoonah-Angoon	AK	Alaska	0	0	0	2146	645	0.301
02110	Juneau	AK	Alaska	1	1	9	32434	5907	0.182	656
02122	Kenai Peninsula	AK	Alaska	3	3	6	57961	13154	0.227	2192
02130	Ketchikan Gateway	AK	Alaska	1	1	4	13745	2951	0.215	738
02150	Kodiak Island Borough	AK	Alaska	1	1	0	13773	1915	0.139
02158	Kusilvak	AK	Alaska	0	0	0	8129	674	0.083
02164	Lake and Peninsula	AK	Alaska	0	0	0	1301	189	0.145
02170	Matanuska-Susitna	AK	Alaska	1	1	14	101135	16358	0.162	1168
02180	Nome	AK	Alaska	1	1	0	9869	1151	0.117
02185	North Slope Borough	AK	Alaska	1	1	0	9757	1157	0.119
02188	Northwest Arctic Borough	AK	Alaska	1	1	0	7715	851	0.11
02195	Petersburg Borough	AK	Alaska	1	1	0	3275	778	0.238
02198	Prince of Wales-Hyder	AK	Alaska	0	0	0	6473	1381	0.213
02220	Sitka Borough	AK	Alaska	2	2	0	8810	1829	0.208
02230	Skagway Municipality	AK	Alaska	0	0	0	1038	175	0.169
02240	Southeast Fairbanks	AK	Alaska	0	0	0	6889	1256	0.182
02261	Valdez-Cordova	AK	Alaska	2	2	0	9439	1790	0.19
02275	Wrangell City and Borough	AK	Alaska	1	1	0	2475	756	0.305
02282	Yakutat City and Borough	AK	Alaska	0	0	0	682	142	0.208
02290	Yukon-Koyukuk	AK	Alaska	0	0	0	5453	1058	0.194
04001	Apache	AZ	Arizona	4	4	0	71602	14107	0.197
04003	Cochise	AZ	Arizona	4	4	12	126516	35231	0.278	2936
04005	Coconino	AZ	Arizona	3	3	41	138639	23195	0.167	566
04007	Gila	AZ	Arizona	3	3	8	53145	18752	0.353	2344
04009	Graham	AZ	Arizona	1	1	0	37700	6933	0.184
04011	Greenlee	AZ	Arizona	0	0	0	9368	1631	0.174
04012	La Paz	AZ	Arizona	2	2	3	20477	9183	0.448	3061
04013	Maricopa	AZ	Arizona	31	34	1004	4155501	808534	0.195	805
04015	Mohave	AZ	Arizona	4	4	80	204691	73559	0.359	919
04017	Navajo	AZ	Arizona	4	4	12	107902	24267	0.225	2022
04019	Pima	AZ	Arizona	9	9	296	1007257	245814	0.244	830
04021	Pinal	AZ	Arizona	4	4	22	405537	100086	0.247	4549
04023	Santa Cruz	AZ	Arizona	1	1	0	46358	10530	0.227
04025	Yavapai	AZ	Arizona	2	2	39	220972	85127	0.385	2183
04027	Yuma	AZ	Arizona	1	1	42	204281	45739	0.224	1089
05001	Arkansas	AR	Arkansas	2	2	0	18352	4693	0.256
05003	Ashley	AR	Arkansas	1	1	6	20771	5094	0.245	849
05005	Baxter	AR	Arkansas	2	2	17	41093	15979	0.389	940
05007	Benton	AR	Arkansas	3	3	30	251823	44616	0.177	1487
05009	Boone	AR	Arkansas	1	1	24	37212	9809	0.264	409
05011	Bradley	AR	Arkansas	1	1	0	10994	2825	0.257
05013	Calhoun	AR	Arkansas	0	0	0	5194	1436	0.276
05015	Carroll	AR	Arkansas	2	2	0	27782	7997	0.288
05017	Chicot	AR	Arkansas	1	1	0	11008	2835	0.258
05019	Clark	AR	Arkansas	1	1	0	22495	5000	0.222
05021	Clay	AR	Arkansas	1	1	0	15190	4125	0.272
05023	Cleburne	AR	Arkansas	1	1	0	25361	8437	0.333
05025	Cleveland	AR	Arkansas	0	0	0	8332	2195	0.263
05027	Columbia	AR	Arkansas	1	1	6	23992	5481	0.228	914
05029	Conway	AR	Arkansas	1	1	0	20954	5270	0.252
05031	Craighead	AR	Arkansas	2	2	66	104246	19242	0.185	292
05033	Crawford	AR	Arkansas	1	1	8	62119	13589	0.219	1699
05035	Crittenden	AR	Arkansas	0	1	0	49278	9487	0.193
05037	Cross	AR	Arkansas	1	1	0	17164	4020	0.234
05039	Dallas	AR	Arkansas	1	1	0	7585	2206	0.291
05041	Desha	AR	Arkansas	2	2	0	12094	3044	0.252
05043	Drew	AR	Arkansas	1	1	5	18620	3890	0.209	778
05045	Faulkner	AR	Arkansas	2	2	25	121282	19658	0.162	786
05047	Franklin	AR	Arkansas	1	1	0	17803	4640	0.261
05049	Fulton	AR	Arkansas	1	1	0	12092	4099	0.339
05051	Garland	AR	Arkansas	3	3	41	97994	28731	0.293	701
05053	Grant	AR	Arkansas	0	0	0	18076	4063	0.225
05055	Greene	AR	Arkansas	1	1	8	44197	9006	0.204	1126
05057	Hempstead	AR	Arkansas	1	1	8	22154	5273	0.238	659
05059	Hot Spring	AR	Arkansas	1	1	6	33480	8417	0.251	1403
05061	Howard	AR	Arkansas	1	1	0	13472	3157	0.234
05063	Independence	AR	Arkansas	1	1	12	37097	8706	0.235	726
05065	Izard	AR	Arkansas	0	0	0	13521	4226	0.313
05067	Jackson	AR	Arkansas	0	0	0	17429	4039	0.232
05069	Jefferson	AR	Arkansas	1	1	34	71373	15529	0.218	457
05071	Johnson	AR	Arkansas	1	1	8	26155	5619	0.215	702
05073	Lafayette	AR	Arkansas	0	0	0	7051	2097	0.297
05075	Lawrence	AR	Arkansas	1	1	0	16777	4447	0.265
05077	Lee	AR	Arkansas	0	0	0	9614	2289	0.238
05079	Lincoln	AR	Arkansas	0	0	0	13885	2882	0.208
05081	Little River	AR	Arkansas	1	1	0	12494	3272	0.262
05083	Logan	AR	Arkansas	2	2	0	21802	5494	0.252
05085	Lonoke	AR	Arkansas	0	0	0	71568	12771	0.178
05087	Madison	AR	Arkansas	0	0	0	15907	3897	0.245
05089	Marion	AR	Arkansas	0	0	0	16374	6057	0.37
05091	Miller	AR	Arkansas	0	0	0	43760	9791	0.224
05093	Mississippi	AR	Arkansas	2	2	5	43534	8720	0.2	1744
05095	Monroe	AR	Arkansas	0	0	0	7420	2254	0.304
05097	Montgomery	AR	Arkansas	0	0	0	9059	3095	0.342
05099	Nevada	AR	Arkansas	0	0	0	8528	2133	0.25
05101	Newton	AR	Arkansas	0	0	0	7898	2612	0.331
05103	Ouachita	AR	Arkansas	1	1	8	24378	6183	0.254	773
05105	Perry	AR	Arkansas	0	0	0	10320	2645	0.256
05107	Phillips	AR	Arkansas	1	1	6	19518	4632	0.237	772
05109	Pike	AR	Arkansas	0	0	0	10893	3014	0.277
05111	Poinsett	AR	Arkansas	0	0	0	24098	5793	0.24
05113	Polk	AR	Arkansas	1	1	6	20212	5939	0.294	990
05115	Pope	AR	Arkansas	1	1	11	63372	12757	0.201	1160
05117	Prairie	AR	Arkansas	0	0	0	8309	2425	0.292
05119	Pulaski	AR	Arkansas	8	8	209	392848	79133	0.201	379
05121	Randolph	AR	Arkansas	1	1	2	17514	4836	0.276	2418
05123	St. Francis	AR	Arkansas	1	1	6	26688	5393	0.202	899
05125	Saline	AR	Arkansas	1	1	16	116252	26545	0.228	1659
05127	Scott	AR	Arkansas	1	1	0	10584	2606	0.246
05129	Searcy	AR	Arkansas	0	0	0	7925	2684	0.339
05131	Sebastian	AR	Arkansas	2	2	69	127362	26807	0.21	389
05133	Sevier	AR	Arkansas	0	0	0	17206	3266	0.19
05135	Sharp	AR	Arkansas	0	0	0	17041	5487	0.322
05137	Stone	AR	Arkansas	1	1	0	12443	4150	0.334
05139	Union	AR	Arkansas	1	1	16	40022	9680	0.242	605
05141	Van Buren	AR	Arkansas	1	1	0	16751	5519	0.329
05143	Washington	AR	Arkansas	3	3	61	223683	34691	0.155	569
05145	White	AR	Arkansas	1	1	13	78706	16257	0.207	1251
05147	Woodruff	AR	Arkansas	0	0	0	6763	1975	0.292
05149	Yell	AR	Arkansas	2	2	0	21601	4891	0.226
06001	Alameda	CA	California	12	12	282	1629615	300276	0.184	1065
06003	Alpine	CA	California	0	0	0	1203	429	0.357
06005	Amador	CA	California	1	1	6	37306	12967	0.348	2161
06007	Butte	CA	California	3	4	43	225207	53616	0.238	1247
06009	Calaveras	CA	California	1	1	0	45057	15872	0.352
06011	Colusa	CA	California	0	1	0	21479	4027	0.187
06013	Contra Costa	CA	California	7	7	163	1123678	231404	0.206	1420
06015	Del Norte	CA	California	1	1	6	27442	6262	0.228	1044
06017	El Dorado	CA	California	2	2	28	185015	49939	0.27	1784
06019	Fresno	CA	California	6	7	164	971616	157757	0.162	962
06021	Glenn	CA	California	1	1	0	27935	6019	0.215
06023	Humboldt	CA	California	4	4	32	135490	31200	0.23	975
06025	Imperial	CA	California	2	2	28	179957	30768	0.171	1099
06027	Inyo	CA	California	2	2	4	18195	5588	0.307	1397
06029	Kern	CA	California	10	10	144	878744	130831	0.149	909
06031	Kings	CA	California	1	1	22	150183	20569	0.137	935
06033	Lake	CA	California	2	2	8	64095	19092	0.298	2387
06035	Lassen	CA	California	1	1	0	31470	5929	0.188
06037	Los Angeles	CA	California	74	76	2126	10105722	1800341	0.178	847
06039	Madera	CA	California	1	1	10	154440	28392	0.184	2839
06041	Marin	CA	California	3	3	66	260814	72684	0.279	1101
06043	Mariposa	CA	California	1	1	0	17658	6311	0.357
06045	Mendocino	CA	California	3	3	14	87497	24313	0.278	1737
06047	Merced	CA	California	2	2	24	267390	40383	0.151	1683
06049	Modoc	CA	California	2	2	0	9017	3106	0.344
06051	Mono	CA	California	1	1	2	14058	2723	0.194	1362
06053	Monterey	CA	California	3	4	27	433168	76257	0.176	2824
06055	Napa	CA	California	2	2	32	141005	33686	0.239	1053
06057	Nevada	CA	California	2	2	10	98838	33612	0.34	3361
06059	Orange	CA	California	24	24	651	3155816	598030	0.19	919
06061	Placer	CA	California	3	3	70	374985	92327	0.246	1319
06063	Plumas	CA	California	3	3	0	18724	6935	0.37
06065	Riverside	CA	California	16	16	351	2355002	437180	0.186	1246
06067	Sacramento	CA	California	8	8	396	1495400	279005	0.187	705
06069	San Benito	CA	California	1	1	8	58671	10074	0.172	1259
06071	San Bernardino	CA	California	18	18	410	2121220	330448	0.156	806
06073	San Diego	CA	California	15	15	570	3283665	604412	0.184	1060
06075	San Francisco	CA	California	10	10	337	864263	179193	0.207	532
06077	San Joaquin	CA	California	7	7	121	724153	123774	0.171	1023
06079	San Luis Obispo	CA	California	3	3	46	280119	70097	0.25	1524
06081	San Mateo	CA	California	7	7	131	763450	161619	0.212	1234
06083	Santa Barbara	CA	California	5	5	82	442996	86816	0.196	1059
06085	Santa Clara	CA	California	9	9	313	1911226	338720	0.177	1082
06087	Santa Cruz	CA	California	3	3	22	273263	57232	0.209	2601
06089	Shasta	CA	California	4	4	81	178919	47900	0.268	591
06091	Sierra	CA	California	0	0	0	2885	986	0.342
06093	Siskiyou	CA	California	1	2	4	43530	14018	0.322	3505
06095	Solano	CA	California	4	4	92	434981	90069	0.207	979
06097	Sonoma	CA	California	8	8	82	500943	124291	0.248	1516
06099	Stanislaus	CA	California	5	5	88	535684	92698	0.173	1053
06101	Sutter	CA	California	1	1	0	95583	19219	0.201
06103	Tehama	CA	California	1	1	8	63247	15876	0.251	1985
06105	Trinity	CA	California	1	1	0	13037	4734	0.363
06107	Tulare	CA	California	3	4	51	458809	69266	0.151	1358
06109	Tuolumne	CA	California	1	1	6	53899	17942	0.333	2990
06111	Ventura	CA	California	6	7	139	847834	167777	0.198	1207
06113	Yolo	CA	California	2	2	14	212605	34981	0.165	2499
06115	Yuba	CA	California	1	1	24	74644	12327	0.165	514
08001	Adams	CO	Colorado	3	3	168	487850	69778	0.143	415
08003	Alamosa	CO	Colorado	1	1	6	16345	2952	0.181	492
08005	Arapahoe	CO	Colorado	3	3	127	626612	111767	0.178	880
08007	Archuleta	CO	Colorado	1	1	0	12592	4283	0.34
08009	Baca	CO	Colorado	1	1	0	3581	1178	0.329
08011	Bent	CO	Colorado	0	0	0	5806	1296	0.223
08013	Boulder	CO	Colorado	5	5	72	316782	59425	0.188	825
08014	Broomfield	CO	Colorado	1	1	20	64283	11264	0.175	563
08015	Chaffee	CO	Colorado	1	1	2	18818	6312	0.335	3156
08017	Cheyenne	CO	Colorado	1	1	0	2127	380	0.179
08019	Clear Creek	CO	Colorado	0	0	0	9257	2454	0.265
08021	Conejos	CO	Colorado	1	1	0	8147	2034	0.25
08023	Costilla	CO	Colorado	0	0	0	3628	1272	0.351
08025	Crowley	CO	Colorado	0	0	0	5514	1074	0.195
08027	Custer	CO	Colorado	0	0	0	4505	2092	0.464
08029	Delta	CO	Colorado	1	1	6	30217	9773	0.323	1629
08031	Denver	CO	Colorado	6	6	227	678467	109403	0.161	482
08033	Dolores	CO	Colorado	0	0	0	1736	537	0.309
08035	Douglas	CO	Colorado	3	3	54	320940	50139	0.156	929
08037	Eagle	CO	Colorado	1	1	5	53726	8107	0.151	1621
08039	Elbert	CO	Colorado	0	0	0	24553	5592	0.228
08041	El Paso	CO	Colorado	3	3	95	674826	116223	0.172	1223
08043	Fremont	CO	Colorado	1	1	4	46601	12609	0.271	3152
08045	Garfield	CO	Colorado	2	2	5	57945	10202	0.176	2040
08047	Gilpin	CO	Colorado	0	0	0	5793	1583	0.273
08049	Grand	CO	Colorado	1	1	0	14793	3858	0.261
08051	Gunnison	CO	Colorado	1	1	0	16215	2905	0.179
08053	Hinsdale	CO	Colorado	0	0	0	820	329	0.401
08055	Huerfano	CO	Colorado	1	1	0	6498	2568	0.395
08057	Jackson	CO	Colorado	0	0	0	1372	398	0.29
08059	Jefferson	CO	Colorado	4	4	94	564029	124374	0.221	1323
08061	Kiowa	CO	Colorado	1	1	0	1368	370	0.27
08063	Kit Carson	CO	Colorado	1	1	0	7846	1873	0.239
08065	Lake	CO	Colorado	1	1	0	7481	1439	0.192
08067	La Plata	CO	Colorado	2	2	11	54469	12490	0.229	1135
08069	Larimer	CO	Colorado	5	5	55	330976	67199	0.203	1222
08071	Las Animas	CO	Colorado	1	1	0	14151	4307	0.304
08073	Lincoln	CO	Colorado	1	1	0	5520	1200	0.217
08075	Logan	CO	Colorado	1	1	4	21885	5056	0.231	1264
08077	Mesa	CO	Colorado	3	3	44	148798	35763	0.24	813
08079	Mineral	CO	Colorado	0	0	0	834	394	0.472
08081	Moffat	CO	Colorado	1	1	0	13056	2777	0.213
08083	Montezuma	CO	Colorado	1	1	4	25770	7299	0.283	1825
08085	Montrose	CO	Colorado	1	1	8	40908	12041	0.294	1505
08087	Morgan	CO	Colorado	2	2	6	28123	6047	0.215	1008
08089	Otero	CO	Colorado	1	1	4	18325	4816	0.263	1204
08091	Ouray	CO	Colorado	0	0	0	4653	1815	0.39
08093	Park	CO	Colorado	0	0	0	16900	4718	0.279
08095	Phillips	CO	Colorado	2	2	0	4327	1037	0.24
08097	Pitkin	CO	Colorado	1	1	4	17747	4417	0.249	1104
08099	Prowers	CO	Colorado	1	1	0	12084	2840	0.235
08101	Pueblo	CO	Colorado	2	2	32	163368	39318	0.241	1229
08103	Rio Blanco	CO	Colorado	2	2	0	6557	1362	0.208
08105	Rio Grande	CO	Colorado	1	1	0	11430	2857	0.25
08107	Routt	CO	Colorado	1	1	4	24359	4914	0.202	1229
08109	Saguache	CO	Colorado	0	0	0	6338	1917	0.302
08111	San Juan	CO	Colorado	0	0	0	569	164	0.288
08113	San Miguel	CO	Colorado	0	0	0	7804	1475	0.189
08115	Sedgwick	CO	Colorado	1	1	0	2357	770	0.327
08117	Summit	CO	Colorado	1	1	8	29722	5667	0.191	708
08119	Teller	CO	Colorado	1	1	0	23769	6744	0.284
08121	Washington	CO	Colorado	0	0	0	4809	1285	0.267
08123	Weld	CO	Colorado	1	1	26	285729	48279	0.169	1857
08125	Yuma	CO	Colorado	2	2	0	10109	2385	0.236
09001	Fairfield	CT	Connecticut	6	6	173	947328	197334	0.208	1141
09003	Hartford	CT	Connecticut	7	7	216	897417	201242	0.224	932
09005	Litchfield	CT	Connecticut	2	2	21	184454	50170	0.272	2389
09007	Middlesex	CT	Connecticut	1	1	24	164110	41372	0.252	1724
09009	New Haven	CT	Connecticut	8	8	186	862127	194911	0.226	1048
09011	New London	CT	Connecticut	2	2	32	270772	63495	0.234	1984
09013	Tolland	CT	Connecticut	2	2	16	151596	31539	0.208	1971
09015	Windham	CT	Connecticut	2	2	6	116674	25482	0.218	4247
10001	Kent	DE	Delaware	1	1	29	173145	36849	0.213	1271
10003	New Castle	DE	Delaware	2	2	119	555036	112051	0.202	942
10005	Sussex	DE	Delaware	3	3	38	215551	71832	0.333	1890
11001	The District	DC	District of Columbia	6	6	314	672391	113026	0.168	360
12001	Alachua	FL	Florida	2	2	210	259865	47766	0.184	227
12003	Baker	FL	Florida	1	1	0	27537	5367	0.195
12005	Bay	FL	Florida	2	2	77	180117	40210	0.223	522
12007	Bradford	FL	Florida	1	1	0	26775	6394	0.239
12009	Brevard	FL	Florida	7	7	159	568183	170919	0.301	1075
12011	Broward	FL	Florida	14	14	587	1890416	406732	0.215	693
12013	Calhoun	FL	Florida	1	1	0	14458	3483	0.241
12015	Charlotte	FL	Florida	3	3	51	173236	81236	0.469	1593
12017	Citrus	FL	Florida	2	2	40	141373	61636	0.436	1541
12019	Clay	FL	Florida	2	2	28	203291	41495	0.204	1482
12021	Collier	FL	Florida	2	2	73	356774	132129	0.37	1810
12023	Columbia	FL	Florida	2	2	27	68484	17039	0.249	631
12027	DeSoto	FL	Florida	1	1	8	35675	9739	0.273	1217
12029	Dixie	FL	Florida	0	0	0	16323	5078	0.311
12031	Duval	FL	Florida	7	7	412	912043	171837	0.188	417
12033	Escambia	FL	Florida	3	3	120	309924	68143	0.22	568
12035	Flagler	FL	Florida	1	1	18	105015	38651	0.368	2147
12037	Franklin	FL	Florida	1	1	0	11675	3127	0.268
12039	Gadsden	FL	Florida	1	1	0	46113	10880	0.236
12041	Gilchrist	FL	Florida	0	0	0	17191	4554	0.265
12043	Glades	FL	Florida	0	0	0	13197	4162	0.315
12045	Gulf	FL	Florida	1	1	0	16018	3954	0.247
12047	Hamilton	FL	Florida	0	0	0	14238	3247	0.228
12049	Hardee	FL	Florida	1	1	0	27326	5531	0.202
12051	Hendry	FL	Florida	1	1	3	39064	6808	0.174	2269
12053	Hernando	FL	Florida	2	2	44	179144	61882	0.345	1406
12055	Highlands	FL	Florida	2	2	38	100177	41387	0.413	1089
12057	Hillsborough	FL	Florida	8	8	432	1351087	257269	0.19	596
12059	Holmes	FL	Florida	1	1	0	19483	4989	0.256
12061	Indian River	FL	Florida	2	2	40	147981	57277	0.387	1432
12063	Jackson	FL	Florida	1	1	7	48571	12035	0.248	1719
12065	Jefferson	FL	Florida	0	0	0	14085	4326	0.307
12067	Lafayette	FL	Florida	0	0	0	8684	1667	0.192
12069	Lake	FL	Florida	4	4	158	326215	107419	0.329	680
12071	Lee	FL	Florida	4	4	141	700165	239488	0.342	1698
12073	Leon	FL	Florida	2	2	60	285890	49057	0.172	818
12075	Levy	FL	Florida	1	1	0	39713	12422	0.313
12077	Liberty	FL	Florida	0	0	0	8347	1621	0.194
12079	Madison	FL	Florida	1	1	0	18518	4779	0.258
12081	Manatee	FL	Florida	3	3	90	363542	120595	0.332	1340
12083	Marion	FL	Florida	2	2	110	343778	119425	0.347	1086
12085	Martin	FL	Florida	1	1	74	155719	57914	0.372	783
12086	Miami-Dade	FL	Florida	17	17	593	2702602	563748	0.209	951
12087	Monroe	FL	Florida	3	3	14	76745	22310	0.291	1594
12089	Nassau	FL	Florida	1	1	0	78435	21894	0.279
12091	Okaloosa	FL	Florida	3	3	57	197591	41694	0.211	731
12093	Okeechobee	FL	Florida	1	1	8	40228	10230	0.254	1279
12095	Orange	FL	Florida	3	3	388	1290216	206342	0.16	532
12097	Osceola	FL	Florida	3	3	66	325168	57062	0.175	865
12099	Palm Beach	FL	Florida	12	12	401	1426772	414928	0.291	1035
12101	Pasco	FL	Florida	6	6	166	498136	142985	0.287	861
12103	Pinellas	FL	Florida	10	10	279	949842	293786	0.309	1053
12105	Polk	FL	Florida	5	5	145	652256	169578	0.26	1170
12107	Putnam	FL	Florida	1	1	10	72435	21116	0.292	2112
12109	St. Johns	FL	Florida	1	1	47	226578	57092	0.252	1215
12111	St. Lucie	FL	Florida	2	2	69	298763	87591	0.293	1269
12113	Santa Rosa	FL	Florida	3	3	16	166778	34353	0.206	2147
12115	Sarasota	FL	Florida	4	4	118	404839	174026	0.43	1475
12117	Seminole	FL	Florida	2	2	38	449260	92794	0.207	2442
12119	Sumter	FL	Florida	0	0	0	116754	74936	0.642
12121	Suwannee	FL	Florida	1	1	0	43814	11617	0.265
12123	Taylor	FL	Florida	1	1	6	22350	5833	0.261	972
12125	Union	FL	Florida	1	1	0	15300	3196	0.209
12127	Volusia	FL	Florida	5	5	148	518660	160876	0.31	1087
12129	Wakulla	FL	Florida	0	0	0	31586	6317	0.2
12131	Walton	FL	Florida	2	2	28	63457	16604	0.262	593
12133	Washington	FL	Florida	1	1	0	24472	5555	0.227
13001	Appling	GA	Georgia	1	1	3	18471	4208	0.228	1403
13003	Atkinson	GA	Georgia	0	0	0	8313	1451	0.175
13005	Bacon	GA	Georgia	1	1	4	11279	2329	0.206	582
13007	Baker	GA	Georgia	0	0	0	3251	919	0.283
13009	Baldwin	GA	Georgia	1	1	12	45527	9287	0.204	774
13011	Banks	GA	Georgia	0	0	0	18363	4207	0.229
13013	Barrow	GA	Georgia	1	1	6	75099	12454	0.166	2076
13015	Bartow	GA	Georgia	1	1	21	102623	18389	0.179	876
13017	Ben Hill	GA	Georgia	1	1	5	17272	3982	0.231	796
13019	Berrien	GA	Georgia	1	1	0	19014	4266	0.224
13021	Bibb	GA	Georgia	3	3	117	153923	31993	0.208	273
13023	Bleckley	GA	Georgia	1	1	0	12779	2860	0.224
13025	Brantley	GA	Georgia	0	0	0	18411	3792	0.206
13027	Brooks	GA	Georgia	1	1	0	15629	4099	0.262
13029	Bryan	GA	Georgia	0	0	0	34883	4985	0.143
13031	Bulloch	GA	Georgia	1	1	24	73742	11463	0.155	478
13033	Burke	GA	Georgia	1	1	0	22645	4540	0.2
13035	Butts	GA	Georgia	1	1	0	23556	4813	0.204
13037	Calhoun	GA	Georgia	0	0	0	6503	1362	0.209
13039	Camden	GA	Georgia	1	1	5	52252	8503	0.163	1701
13043	Candler	GA	Georgia	1	1	6	10894	2476	0.227	413
13045	Carroll	GA	Georgia	2	2	18	114898	20423	0.178	1135
13047	Catoosa	GA	Georgia	1	1	0	65870	14752	0.224
13049	Charlton	GA	Georgia	0	0	0	12963	2473	0.191
13051	Chatham	GA	Georgia	3	3	78	285506	56014	0.196	718
13053	Chattahoochee	GA	Georgia	0	0	0	11096	645	0.058
13055	Chattooga	GA	Georgia	0	0	0	24880	5705	0.229
13057	Cherokee	GA	Georgia	1	1	15	235896	42210	0.179	2814
13059	Clarke	GA	Georgia	2	2	104	123554	17345	0.14	167
13061	Clay	GA	Georgia	0	0	0	3024	937	0.31
13063	Clayton	GA	Georgia	1	1	34	274150	36959	0.135	1087
13065	Clinch	GA	Georgia	1	1	0	6788	1466	0.216
13067	Cobb	GA	Georgia	2	2	119	739072	120689	0.163	1014
13069	Coffee	GA	Georgia	1	1	10	43048	7860	0.183	786
13071	Colquitt	GA	Georgia	2	2	10	45890	8918	0.194	892
13073	Columbia	GA	Georgia	0	0	0	143723	26092	0.182
13075	Cook	GA	Georgia	1	1	0	17190	3527	0.205
13077	Coweta	GA	Georgia	2	2	19	138015	25269	0.183	1330
13079	Crawford	GA	Georgia	0	0	0	12385	2798	0.226
13081	Crisp	GA	Georgia	1	1	16	23005	5331	0.232	333
13083	Dade	GA	Georgia	0	0	0	16282	4079	0.251
13085	Dawson	GA	Georgia	0	0	0	23397	6208	0.265
13087	Decatur	GA	Georgia	1	1	10	27023	5831	0.216	583
13089	DeKalb	GA	Georgia	3	3	168	736066	121505	0.165	723
13091	Dodge	GA	Georgia	1	1	6	21063	4726	0.224	788
13093	Dooly	GA	Georgia	1	1	0	14053	3522	0.251
13095	Dougherty	GA	Georgia	1	1	50	91522	18997	0.208	380
13097	Douglas	GA	Georgia	1	1	8	140152	22028	0.157	2754
13099	Early	GA	Georgia	1	1	0	10405	2739	0.263
13101	Echols	GA	Georgia	0	0	0	4011	681	0.17
13103	Effingham	GA	Georgia	1	1	0	57087	9061	0.159
13105	Elbert	GA	Georgia	1	1	4	19288	5092	0.264	1273
13107	Emanuel	GA	Georgia	1	1	8	22502	4782	0.213	598
13109	Evans	GA	Georgia	1	1	0	10757	2260	0.21
13111	Fannin	GA	Georgia	1	1	5	24480	8800	0.359	1760
13113	Fayette	GA	Georgia	1	1	37	110306	25277	0.229	683
13115	Floyd	GA	Georgia	2	2	65	96471	20941	0.217	322
13117	Forsyth	GA	Georgia	1	1	24	211300	33215	0.157	1384
13119	Franklin	GA	Georgia	1	1	8	22328	5691	0.255	711
13121	Fulton	GA	Georgia	7	7	538	1010420	159840	0.158	297
13123	Gilmer	GA	Georgia	0	0	0	29614	9166	0.31
13125	Glascock	GA	Georgia	0	0	0	3027	713	0.236
13127	Glynn	GA	Georgia	1	1	24	83467	20679	0.248	862
13129	Gordon	GA	Georgia	1	1	8	56424	10941	0.194	1368
13131	Grady	GA	Georgia	1	1	4	25048	5593	0.223	1398
13133	Greene	GA	Georgia	1	1	0	16732	6034	0.361
13135	Gwinnett	GA	Georgia	3	3	82	889954	122430	0.138	1493
13137	Habersham	GA	Georgia	1	1	4	43878	10665	0.243	2666
13139	Hall	GA	Georgia	1	1	85	192865	36793	0.191	433
13141	Hancock	GA	Georgia	0	0	0	8667	2435	0.281
13143	Haralson	GA	Georgia	1	1	0	28722	6357	0.221
13145	Harris	GA	Georgia	0	0	0	33198	7948	0.239
13147	Hart	GA	Georgia	0	0	0	25535	7015	0.275
13149	Heard	GA	Georgia	0	0	0	11607	2692	0.232
13151	Henry	GA	Georgia	1	1	40	217506	34127	0.157	853
13153	Houston	GA	Georgia	2	2	36	150341	25522	0.17	709
13155	Irwin	GA	Georgia	1	1	0	9278	2170	0.234
13157	Jackson	GA	Georgia	1	1	0	63851	12724	0.199
13159	Jasper	GA	Georgia	1	1	0	13732	3116	0.227
13161	Jeff Davis	GA	Georgia	1	1	4	14999	3219	0.215	805
13163	Jefferson	GA	Georgia	1	1	0	15954	3828	0.24
13165	Jenkins	GA	Georgia	1	1	0	8929	2049	0.229
13167	Johnson	GA	Georgia	0	0	0	9800	2334	0.238
13169	Jones	GA	Georgia	0	0	0	28540	6333	0.222
13171	Lamar	GA	Georgia	0	0	0	18282	3955	0.216
13173	Lanier	GA	Georgia	1	1	0	10388	1972	0.19
13175	Laurens	GA	Georgia	1	1	16	47451	10610	0.224	663
13177	Lee	GA	Georgia	0	0	0	29216	4964	0.17
13179	Liberty	GA	Georgia	1	1	0	62120	7447	0.12
13181	Lincoln	GA	Georgia	0	0	0	7768	2318	0.298
13183	Long	GA	Georgia	0	0	0	17857	2398	0.134
13185	Lowndes	GA	Georgia	1	1	48	113941	17921	0.157	373
13187	Lumpkin	GA	Georgia	0	0	0	31567	7478	0.237
13189	McDuffie	GA	Georgia	1	1	0	21488	4855	0.226
13191	McIntosh	GA	Georgia	0	0	0	14061	4475	0.318
13193	Macon	GA	Georgia	0	0	0	13675	2925	0.214
13195	Madison	GA	Georgia	0	0	0	28600	6721	0.235
13197	Marion	GA	Georgia	0	0	0	8558	2190	0.256
13199	Meriwether	GA	Georgia	1	1	0	21152	5261	0.249
13201	Miller	GA	Georgia	1	1	0	5884	1561	0.265
13205	Mitchell	GA	Georgia	1	1	0	22574	4919	0.218
13207	Monroe	GA	Georgia	1	1	0	26795	6594	0.246
13209	Montgomery	GA	Georgia	0	0	0	8962	1891	0.211
13211	Morgan	GA	Georgia	1	1	0	18013	4678	0.26
13213	Murray	GA	Georgia	1	1	0	39444	7520	0.191
13215	Muscogee	GA	Georgia	3	3	61	198647	34483	0.174	565
13217	Newton	GA	Georgia	1	1	10	105042	18455	0.176	1846
13219	Oconee	GA	Georgia	0	0	0	35972	7602	0.211
13221	Oglethorpe	GA	Georgia	0	0	0	14654	3441	0.235
13223	Paulding	GA	Georgia	1	1	8	152399	21365	0.14	2671
13225	Peach	GA	Georgia	1	1	0	27027	5201	0.192
13227	Pickens	GA	Georgia	1	1	6	30343	8464	0.279	1411
13229	Pierce	GA	Georgia	0	0	0	19141	4228	0.221
13231	Pike	GA	Georgia	0	0	0	17919	3658	0.204
13233	Polk	GA	Georgia	1	1	0	41444	8705	0.21
13235	Pulaski	GA	Georgia	1	1	6	11396	2806	0.246	468
13237	Putnam	GA	Georgia	1	1	0	21430	6275	0.293
13239	Quitman	GA	Georgia	0	0	0	2140	913	0.427
13241	Rabun	GA	Georgia	1	1	0	16354	5564	0.34
13243	Randolph	GA	Georgia	1	1	0	7206	2258	0.313
13245	Richmond	GA	Georgia	3	3	264	201568	38152	0.189	145
13247	Rockdale	GA	Georgia	1	1	16	88482	17124	0.194	1070
13249	Schley	GA	Georgia	0	0	0	5168	1100	0.213
13251	Screven	GA	Georgia	1	1	0	14037	3450	0.246
13253	Seminole	GA	Georgia	1	1	0	8549	2541	0.297
13255	Spalding	GA	Georgia	1	1	22	64192	14777	0.23	672
13257	Stephens	GA	Georgia	1	1	6	25625	6327	0.247	1055
13259	Stewart	GA	Georgia	0	0	0	5832	1209	0.207
13261	Sumter	GA	Georgia	1	1	10	30687	6539	0.213	654
13263	Talbot	GA	Georgia	0	0	0	6423	2045	0.318
13265	Taliaferro	GA	Georgia	0	0	0	1844	511	0.277
13267	Tattnall	GA	Georgia	1	1	0	25402	4769	0.188
13269	Taylor	GA	Georgia	0	0	0	8267	2020	0.244
13271	Telfair	GA	Georgia	0	0	0	16339	3802	0.233
13273	Terrell	GA	Georgia	0	0	0	8978	2148	0.239
13275	Thomas	GA	Georgia	1	1	35	44909	10319	0.23	295
13277	Tift	GA	Georgia	1	1	20	40531	8091	0.2	405
13279	Toombs	GA	Georgia	1	1	8	27160	5815	0.214	727
13281	Towns	GA	Georgia	1	1	0	11173	4566	0.409
13283	Treutlen	GA	Georgia	0	0	0	6752	1666	0.247
13285	Troup	GA	Georgia	1	1	20	69433	13380	0.193	669
13287	Turner	GA	Georgia	0	0	0	8036	2004	0.249
13289	Twiggs	GA	Georgia	0	0	0	8323	2395	0.288
13291	Union	GA	Georgia	1	1	5	22262	8856	0.398	1771
13293	Upson	GA	Georgia	1	1	28	26241	6294	0.24	225
13295	Walker	GA	Georgia	0	0	0	68609	16583	0.242
13297	Walton	GA	Georgia	1	1	7	88695	17821	0.201	2546
13299	Ware	GA	Georgia	1	1	22	35688	7974	0.223	362
13301	Warren	GA	Georgia	0	0	0	5410	1586	0.293
13303	Washington	GA	Georgia	1	1	0	20506	4483	0.219
13305	Wayne	GA	Georgia	1	1	12	29833	6149	0.206	512
13307	Webster	GA	Georgia	0	0	0	2627	671	0.255
13309	Wheeler	GA	Georgia	0	0	0	7952	1550	0.195
13311	White	GA	Georgia	0	0	0	28509	7553	0.265
13313	Whitfield	GA	Georgia	1	1	34	103963	18625	0.179	548
13315	Wilcox	GA	Georgia	0	0	0	8896	1960	0.22
13317	Wilkes	GA	Georgia	1	1	0	9905	2863	0.289
13319	Wilkinson	GA	Georgia	0	0	0	9147	2285	0.25
13321	Worth	GA	Georgia	1	1	0	20809	5131	0.247
15001	Hawaii	HI	Hawaii	6	6	24	196325	52582	0.268	2191
15003	Honolulu	HI	Hawaii	8	8	148	990060	218287	0.22	1475
15005	Kalawao	HI	Hawaii	0	0	0	86	27	0.314
15007	Kauai	HI	Hawaii	3	3	9	71093	18043	0.254	2005
15009	Maui	HI	Hawaii	4	4	20	164094	37939	0.231	1897
16001	Ada	ID	Idaho	3	3	105	435117	80856	0.186	770
16003	Adams	ID	Idaho	0	0	0	3946	1513	0.383
16005	Bannock	ID	Idaho	1	1	20	84113	15750	0.187	788
16007	Bear Lake	ID	Idaho	1	1	0	5942	1565	0.263
16009	Benewah	ID	Idaho	1	1	0	9050	2780	0.307
16011	Bingham	ID	Idaho	1	2	5	45369	8667	0.191	1733
16013	Blaine	ID	Idaho	1	1	0	21583	5080	0.235
16015	Boise	ID	Idaho	0	0	0	6968	2461	0.353
16017	Bonner	ID	Idaho	1	1	4	41855	13317	0.318	3329
16019	Bonneville	ID	Idaho	2	2	35	110404	20000	0.181	571
16021	Boundary	ID	Idaho	1	1	0	11323	3394	0.3
16023	Butte	ID	Idaho	1	1	0	2613	807	0.309
16025	Camas	ID	Idaho	0	0	0	886	267	0.301
16027	Canyon	ID	Idaho	3	3	41	207027	36810	0.178	898
16029	Caribou	ID	Idaho	1	1	0	6862	1645	0.24
16031	Cassia	ID	Idaho	1	1	6	23472	4324	0.184	721
16033	Clark	ID	Idaho	0	0	0	1055	184	0.174
16035	Clearwater	ID	Idaho	1	1	0	8533	3035	0.356
16037	Custer	ID	Idaho	0	0	0	4141	1641	0.396
16039	Elmore	ID	Idaho	1	1	0	26232	4586	0.175
16041	Franklin	ID	Idaho	1	1	0	13120	2458	0.187
16043	Fremont	ID	Idaho	0	0	0	12889	2942	0.228
16045	Gem	ID	Idaho	1	1	0	16850	4887	0.29
16047	Gooding	ID	Idaho	1	1	0	15110	3215	0.213
16049	Idaho	ID	Idaho	2	2	0	16275	5638	0.346
16051	Jefferson	ID	Idaho	0	0	0	27410	4382	0.16
16053	Jerome	ID	Idaho	1	1	0	23039	4145	0.18
16055	Kootenai	ID	Idaho	2	2	55	150128	36910	0.246	671
16057	Latah	ID	Idaho	0	1	0	38697	6552	0.169
16059	Lemhi	ID	Idaho	1	1	0	7755	2895	0.373
16061	Lewis	ID	Idaho	0	0	0	3824	1252	0.327
16063	Lincoln	ID	Idaho	0	0	0	5296	973	0.184
16065	Madison	ID	Idaho	1	1	4	38241	3374	0.088	844
16067	Minidoka	ID	Idaho	1	1	0	20448	4407	0.216
16069	Nez Perce	ID	Idaho	1	1	9	40014	10185	0.255	1132
16071	Oneida	ID	Idaho	1	1	0	4284	1060	0.247
16073	Owyhee	ID	Idaho	0	0	0	11384	2589	0.227
16075	Payette	ID	Idaho	0	0	0	22839	5298	0.232
16077	Power	ID	Idaho	1	1	0	7667	1593	0.208
16079	Shoshone	ID	Idaho	1	1	0	12490	3745	0.3
16081	Teton	ID	Idaho	1	1	0	10776	1500	0.139
16083	Twin Falls	ID	Idaho	1	1	30	82248	16621	0.202	554
16085	Valley	ID	Idaho	2	2	0	10104	3660	0.362
16087	Washington	ID	Idaho	1	1	0	9996	3185	0.319
17001	Adams	IL	Illinois	1	1	25	66787	16968	0.254	679
17003	Alexander	IL	Illinois	0	0	0	6776	1841	0.272
17005	Bond	IL	Illinois	1	1	0	17034	4097	0.241
17007	Boone	IL	Illinois	0	0	0	53638	10544	0.197
17009	Brown	IL	Illinois	0	0	0	6791	1260	0.186
17011	Bureau	IL	Illinois	2	2	9	33619	9368	0.279	1041
17013	Calhoun	IL	Illinois	0	0	0	4897	1471	0.3
17015	Carroll	IL	Illinois	0	0	0	14704	4653	0.316
17017	Cass	IL	Illinois	0	0	0	12880	2896	0.225
17019	Champaign	IL	Illinois	2	2	51	207946	35016	0.168	687
17021	Christian	IL	Illinois	2	2	0	33562	8376	0.25
17023	Clark	IL	Illinois	0	0	0	15924	4021	0.253
17025	Clay	IL	Illinois	1	1	0	13393	3767	0.281
17027	Clinton	IL	Illinois	1	1	4	37640	8553	0.227	2138
17029	Coles	IL	Illinois	1	1	9	52540	11175	0.213	1242
17031	Cook	IL	Illinois	46	46	1606	5238541	1005046	0.192	626
17033	Crawford	IL	Illinois	1	1	0	19214	4912	0.256
17035	Cumberland	IL	Illinois	0	0	0	10899	2730	0.25
17037	DeKalb	IL	Illinois	2	2	16	104473	16887	0.162	1055
17039	De Witt	IL	Illinois	1	1	0	16176	3995	0.247
17041	Douglas	IL	Illinois	0	0	0	19830	4574	0.231
17043	DuPage	IL	Illinois	6	6	257	931826	189208	0.203	736
17045	Edgar	IL	Illinois	1	1	0	17603	4908	0.279
17047	Edwards	IL	Illinois	0	0	0	6570	1759	0.268
17049	Effingham	IL	Illinois	1	1	10	34164	8041	0.235	804
17051	Fayette	IL	Illinois	1	1	4	21980	5172	0.235	1293
17053	Ford	IL	Illinois	1	1	2	13470	3522	0.261	1761
17055	Franklin	IL	Illinois	1	1	0	39302	10199	0.26
17057	Fulton	IL	Illinois	1	1	5	35733	9382	0.263	1876
17059	Gallatin	IL	Illinois	0	0	0	5226	1526	0.292
17061	Greene	IL	Illinois	1	1	0	13311	3320	0.249
17063	Grundy	IL	Illinois	1	1	8	50333	9077	0.18	1135
17065	Hamilton	IL	Illinois	1	1	0	8259	2379	0.288
17067	Hancock	IL	Illinois	1	1	0	18264	5387	0.295
17069	Hardin	IL	Illinois	1	1	0	4161	1198	0.288
17071	Henderson	IL	Illinois	0	0	0	6927	2225	0.321
17073	Henry	IL	Illinois	2	2	3	49649	12932	0.26	4311
17075	Iroquois	IL	Illinois	1	1	0	28457	8008	0.281
17077	Jackson	IL	Illinois	2	2	21	59115	11301	0.191	538
17079	Jasper	IL	Illinois	0	0	0	9608	2496	0.26
17081	Jefferson	IL	Illinois	2	2	22	38358	9508	0.248	432
17083	Jersey	IL	Illinois	1	1	4	22215	5642	0.254	1411
17085	Jo Daviess	IL	Illinois	1	1	0	22046	7704	0.349
17087	Johnson	IL	Illinois	0	0	0	12899	3202	0.248
17089	Kane	IL	Illinois	5	5	103	529402	93411	0.176	907
17091	Kankakee	IL	Illinois	2	2	56	110801	23667	0.214	423
17093	Kendall	IL	Illinois	0	0	0	122933	16292	0.133
17095	Knox	IL	Illinois	2	2	18	51374	13829	0.269	768
17097	Lake	IL	Illinois	6	6	108	704476	131932	0.187	1222
17099	LaSalle	IL	Illinois	3	3	13	111151	27315	0.246	2101
17101	Lawrence	IL	Illinois	1	1	0	16457	3784	0.23
17103	Lee	IL	Illinois	1	1	6	34670	8585	0.248	1431
17105	Livingston	IL	Illinois	1	1	5	36812	9046	0.246	1809
17107	Logan	IL	Illinois	1	1	0	29488	7086	0.24
17109	McDonough	IL	Illinois	1	1	7	31597	7097	0.225	1014
17111	McHenry	IL	Illinois	2	2	33	308043	58774	0.191	1781
17113	McLean	IL	Illinois	2	2	30	173231	29727	0.172	991
17115	Macon	IL	Illinois	2	2	65	107587	27263	0.253	419
17117	Macoupin	IL	Illinois	2	2	0	45960	12200	0.265
17119	Madison	IL	Illinois	5	5	58	266153	60531	0.227	1044
17121	Marion	IL	Illinois	2	2	9	38305	9723	0.254	1080
17123	Marshall	IL	Illinois	0	0	0	11925	3583	0.3
17125	Mason	IL	Illinois	1	1	0	13904	3948	0.284
17127	Massac	IL	Illinois	1	1	0	14594	3963	0.272
17129	Menard	IL	Illinois	0	0	0	12416	3156	0.254
17131	Mercer	IL	Illinois	1	1	0	15794	4395	0.278
17133	Monroe	IL	Illinois	0	0	0	33739	7670	0.227
17135	Montgomery	IL	Illinois	2	2	0	29173	7326	0.251
17137	Morgan	IL	Illinois	1	1	9	34442	8786	0.255	976
17139	Moultrie	IL	Illinois	0	0	0	14711	3592	0.244
17141	Ogle	IL	Illinois	1	1	4	51619	12307	0.238	3077
17143	Peoria	IL	Illinois	3	3	107	186145	40675	0.219	380
17145	Perry	IL	Illinois	2	2	0	21467	5195	0.242
17147	Piatt	IL	Illinois	1	1	0	16433	4034	0.245
17149	Pike	IL	Illinois	1	1	0	15930	4190	0.263
17151	Pope	IL	Illinois	0	0	0	4360	1604	0.368
17153	Pulaski	IL	Illinois	0	0	0	5691	1566	0.275
17155	Putnam	IL	Illinois	0	0	0	5771	1655	0.287
17157	Randolph	IL	Illinois	3	3	0	32829	8130	0.248
17159	Richland	IL	Illinois	1	1	8	15953	4167	0.261	521
17161	Rock Island	IL	Illinois	2	2	58	146205	35994	0.246	621
17163	St. Clair	IL	Illinois	4	4	42	264433	54566	0.206	1299
17165	Saline	IL	Illinois	2	2	0	24430	6376	0.261
17167	Sangamon	IL	Illinois	2	2	99	198134	45191	0.228	456
17169	Schuyler	IL	Illinois	1	1	0	7181	2052	0.286
17171	Scott	IL	Illinois	0	0	0	5109	1345	0.263
17173	Shelby	IL	Illinois	1	1	0	21906	6197	0.283
17175	Stark	IL	Illinois	0	0	0	5551	1581	0.285
17177	Stephenson	IL	Illinois	1	1	8	45839	13432	0.293	1679
17179	Tazewell	IL	Illinois	2	2	8	134695	31973	0.237	3997
17181	Union	IL	Illinois	1	1	0	17267	4624	0.268
17183	Vermilion	IL	Illinois	2	2	12	79207	19371	0.245	1614
17185	Wabash	IL	Illinois	1	1	4	11568	3004	0.26	751
17187	Warren	IL	Illinois	1	1	0	17429	4147	0.238
17189	Washington	IL	Illinois	1	1	0	14260	3641	0.255
17191	Wayne	IL	Illinois	1	1	4	16569	4419	0.267	1105
17193	White	IL	Illinois	0	0	0	14186	3906	0.275
17195	Whiteside	IL	Illinois	2	2	9	56823	14999	0.264	1667
17197	Will	IL	Illinois	3	3	92	687727	116816	0.17	1270
17199	Williamson	IL	Illinois	2	2	26	67477	16353	0.242	629
17201	Winnebago	IL	Illinois	3	3	87	287512	65218	0.227	750
17203	Woodford	IL	Illinois	1	1	0	38942	8978	0.231
18001	Adams	IN	Indiana	1	1	4	35018	7140	0.204	1785
18003	Allen	IN	Indiana	6	6	170	367747	70976	0.193	418
18005	Bartholomew	IN	Indiana	1	1	17	81024	16862	0.208	992
18007	Benton	IN	Indiana	0	0	0	8685	2012	0.232
18009	Blackford	IN	Indiana	1	1	0	12214	3332	0.273
18011	Boone	IN	Indiana	1	1	8	63013	11259	0.179	1407
18013	Brown	IN	Indiana	0	0	0	15007	4827	0.322
18015	Carroll	IN	Indiana	0	0	0	19994	5056	0.253
18017	Cass	IN	Indiana	1	1	5	38248	8878	0.232	1776
18019	Clark	IN	Indiana	1	1	25	114893	23978	0.209	959
18021	Clay	IN	Indiana	1	1	0	26375	6400	0.243
18023	Clinton	IN	Indiana	1	1	0	32455	7149	0.22
18025	Crawford	IN	Indiana	0	0	0	10598	2693	0.254
18027	Daviess	IN	Indiana	1	1	5	32777	6611	0.202	1322
18029	Dearborn	IN	Indiana	1	1	8	49564	11201	0.226	1400
18031	Decatur	IN	Indiana	1	1	0	26480	5924	0.224
18033	DeKalb	IN	Indiana	1	1	8	42524	9197	0.216	1150
18035	Delaware	IN	Indiana	1	1	36	115938	25540	0.22	709
18037	Dubois	IN	Indiana	1	1	26	42379	9945	0.235	383
18039	Elkhart	IN	Indiana	2	2	35	202924	38669	0.191	1105
18041	Fayette	IN	Indiana	1	1	20	23426	6065	0.259	303
18043	Floyd	IN	Indiana	2	2	16	76481	16661	0.218	1041
18045	Fountain	IN	Indiana	0	0	0	16620	4359	0.262
18047	Franklin	IN	Indiana	1	1	7	22835	5422	0.237	775
18049	Fulton	IN	Indiana	1	1	4	20296	5248	0.259	1312
18051	Gibson	IN	Indiana	1	1	5	33596	7576	0.226	1515
18053	Grant	IN	Indiana	1	1	19	67615	16678	0.247	878
18055	Greene	IN	Indiana	1	1	5	32431	8315	0.256	1663
18057	Hamilton	IN	Indiana	4	5	10	309687	49209	0.159	4921
18059	Hancock	IN	Indiana	1	1	24	72776	15514	0.213	646
18061	Harrison	IN	Indiana	1	1	4	39450	9441	0.239	2360
18063	Hendricks	IN	Indiana	2	3	39	158170	28822	0.182	739
18065	Henry	IN	Indiana	1	1	10	48649	12162	0.25	1216
18067	Howard	IN	Indiana	1	2	13	82457	20461	0.248	1574
18069	Huntington	IN	Indiana	1	1	0	36520	8144	0.223
18071	Jackson	IN	Indiana	1	1	7	43779	9380	0.214	1340
18073	Jasper	IN	Indiana	1	1	4	33448	7509	0.224	1877
18075	Jay	IN	Indiana	1	1	0	21107	5031	0.238
18077	Jefferson	IN	Indiana	1	1	6	32293	7164	0.222	1194
18079	Jennings	IN	Indiana	1	1	0	27840	6079	0.218
18081	Johnson	IN	Indiana	1	1	6	149359	29234	0.196	4872
18083	Knox	IN	Indiana	1	1	30	37763	8735	0.231	291
18085	Kosciusko	IN	Indiana	1	1	14	78720	16785	0.213	1199
18087	LaGrange	IN	Indiana	1	1	0	38720	7291	0.188
18089	Lake	IN	Indiana	9	9	188	488694	104898	0.215	558
18091	LaPorte	IN	Indiana	2	2	34	110839	25713	0.232	756
18093	Lawrence	IN	Indiana	2	2	6	45669	11750	0.257	1958
18095	Madison	IN	Indiana	2	3	21	129641	30680	0.237	1461
18097	Marion	IN	Indiana	8	9	526	939964	160942	0.171	306
18099	Marshall	IN	Indiana	2	2	7	46752	10866	0.232	1552
18101	Martin	IN	Indiana	0	0	0	10219	2501	0.245
18103	Miami	IN	Indiana	1	1	4	36035	7957	0.221	1989
18105	Monroe	IN	Indiana	2	2	38	144436	23773	0.165	626
18107	Montgomery	IN	Indiana	1	1	5	38288	8814	0.23	1763
18109	Morgan	IN	Indiana	1	1	10	69533	15510	0.223	1551
18111	Newton	IN	Indiana	0	0	0	14056	3390	0.241
18113	Noble	IN	Indiana	1	1	0	47421	9969	0.21
18115	Ohio	IN	Indiana	0	0	0	5911	1568	0.265
18117	Orange	IN	Indiana	1	1	0	19623	4677	0.238
18119	Owen	IN	Indiana	0	0	0	20957	5415	0.258
18121	Parke	IN	Indiana	0	0	0	17062	4098	0.24
18123	Perry	IN	Indiana	1	1	4	19229	4691	0.244	1173
18125	Pike	IN	Indiana	0	0	0	12471	3271	0.262
18127	Porter	IN	Indiana	1	1	32	167391	36197	0.216	1131
18129	Posey	IN	Indiana	0	0	0	25599	6134	0.24
18131	Pulaski	IN	Indiana	1	1	0	12761	3245	0.254
18133	Putnam	IN	Indiana	1	1	6	37543	8058	0.215	1343
18135	Randolph	IN	Indiana	1	1	0	25203	6468	0.257
18137	Ripley	IN	Indiana	0	0	0	28372	6402	0.226
18139	Rush	IN	Indiana	1	1	0	16765	4040	0.241
18141	St. Joseph	IN	Indiana	3	3	74	268613	57385	0.214	775
18143	Scott	IN	Indiana	1	1	4	23722	5247	0.221	1312
18145	Shelby	IN	Indiana	0	1	0	44339	10052	0.227
18147	Spencer	IN	Indiana	0	0	0	20610	5172	0.251
18149	Starke	IN	Indiana	1	1	1	22966	5553	0.242	5553
18151	Steuben	IN	Indiana	1	1	2	34459	8776	0.255	4388
18153	Sullivan	IN	Indiana	1	1	4	20900	4547	0.218	1137
18155	Switzerland	IN	Indiana	0	0	0	10617	2474	0.233
18157	Tippecanoe	IN	Indiana	2	2	30	186081	28594	0.154	953
18159	Tipton	IN	Indiana	1	1	0	15290	3910	0.256
18161	Union	IN	Indiana	0	0	0	7225	1800	0.249
18163	Vanderburgh	IN	Indiana	2	2	154	181831	40560	0.223	263
18165	Vermillion	IN	Indiana	1	1	6	15644	4085	0.261	681
18167	Vigo	IN	Indiana	2	2	54	107723	22306	0.207	413
18169	Wabash	IN	Indiana	1	1	0	31848	8461	0.266
18171	Warren	IN	Indiana	1	1	0	8269	2214	0.268
18173	Warrick	IN	Indiana	2	2	24	61581	13734	0.223	572
18175	Washington	IN	Indiana	1	1	0	27807	6355	0.229
18177	Wayne	IN	Indiana	1	1	30	66972	16958	0.253	565
18179	Wells	IN	Indiana	1	1	7	27832	6613	0.238	945
18181	White	IN	Indiana	1	1	0	24279	6402	0.264
18183	Whitley	IN	Indiana	1	1	0	33481	8060	0.241
19001	Adair	IA	Iowa	1	1	0	7192	2161	0.3
19003	Adams	IA	Iowa	1	1	0	3785	1142	0.302
19005	Allamakee	IA	Iowa	1	1	0	13940	4004	0.287
19007	Appanoose	IA	Iowa	1	1	3	12547	3759	0.3	1253
19009	Audubon	IA	Iowa	1	1	0	5711	1817	0.318
19011	Benton	IA	Iowa	1	1	0	25646	5969	0.233
19013	Black Hawk	IA	Iowa	3	3	24	132960	28271	0.213	1178
19015	Boone	IA	Iowa	1	1	3	26381	6491	0.246	2164
19017	Bremer	IA	Iowa	2	2	0	24741	6207	0.251
19019	Buchanan	IA	Iowa	1	1	0	21101	4777	0.226
19021	Buena Vista	IA	Iowa	1	1	5	20369	4287	0.21	857
19023	Butler	IA	Iowa	0	0	0	14822	4297	0.29
19025	Calhoun	IA	Iowa	1	1	2	9814	3002	0.306	1501
19027	Carroll	IA	Iowa	2	2	6	20428	5287	0.259	881
19029	Cass	IA	Iowa	1	1	4	13327	3898	0.292	975
19031	Cedar	IA	Iowa	0	0	0	18368	4727	0.257
19033	Cerro Gordo	IA	Iowa	1	1	18	43134	12003	0.278	667
19035	Cherokee	IA	Iowa	1	1	0	11577	3637	0.314
19037	Chickasaw	IA	Iowa	1	1	0	12140	3281	0.27
19039	Clarke	IA	Iowa	1	1	0	9267	2256	0.243
19041	Clay	IA	Iowa	1	1	0	16387	4559	0.278
19043	Clayton	IA	Iowa	2	2	0	17711	5374	0.303
19045	Clinton	IA	Iowa	2	2	10	47587	12082	0.254	1208
19047	Crawford	IA	Iowa	1	1	0	17131	3829	0.224
19049	Dallas	IA	Iowa	1	1	0	80864	12950	0.16
19051	Davis	IA	Iowa	1	1	0	8834	2110	0.239
19053	Decatur	IA	Iowa	1	1	0	8105	2081	0.257
19055	Delaware	IA	Iowa	1	1	0	17326	4418	0.255
19057	Des Moines	IA	Iowa	1	1	12	39876	10621	0.266	885
19059	Dickinson	IA	Iowa	1	1	3	17000	5604	0.33	1868
19061	Dubuque	IA	Iowa	3	3	18	96571	22155	0.229	1231
19063	Emmet	IA	Iowa	1	1	0	9661	2546	0.264
19065	Fayette	IA	Iowa	2	2	0	20139	5519	0.274
19067	Floyd	IA	Iowa	1	1	0	15904	4425	0.278
19069	Franklin	IA	Iowa	1	1	0	10326	2904	0.281
19071	Fremont	IA	Iowa	1	1	0	6985	2030	0.291
19073	Greene	IA	Iowa	1	1	4	9046	2584	0.286	646
19075	Grundy	IA	Iowa	1	1	0	12354	3350	0.271
19077	Guthrie	IA	Iowa	1	1	0	10664	3168	0.297
19079	Hamilton	IA	Iowa	1	1	0	15201	4022	0.265
19081	Hancock	IA	Iowa	1	1	0	10971	3061	0.279
19083	Hardin	IA	Iowa	1	1	0	17239	4835	0.28
19085	Harrison	IA	Iowa	1	1	0	14196	3779	0.266
19087	Henry	IA	Iowa	1	1	0	19865	4736	0.238
19089	Howard	IA	Iowa	1	1	0	9321	2496	0.268
19091	Humboldt	IA	Iowa	1	1	0	9586	2548	0.266
19093	Ida	IA	Iowa	1	1	0	6965	2010	0.289
19095	Iowa	IA	Iowa	1	1	0	16231	3976	0.245
19097	Jackson	IA	Iowa	1	1	0	19409	5316	0.274
19099	Jasper	IA	Iowa	1	1	4	36789	9289	0.252	2322
19101	Jefferson	IA	Iowa	1	1	0	17945	5327	0.297
19103	Johnson	IA	Iowa	2	2	95	144425	21650	0.15	228
19105	Jones	IA	Iowa	1	1	0	20468	5304	0.259
19107	Keokuk	IA	Iowa	1	1	0	10223	2899	0.284
19109	Kossuth	IA	Iowa	1	1	0	15166	4508	0.297
19111	Lee	IA	Iowa	2	2	10	34785	9123	0.262	912
19113	Linn	IA	Iowa	2	2	44	220008	45693	0.208	1038
19115	Louisa	IA	Iowa	0	0	0	11238	2610	0.232
19117	Lucas	IA	Iowa	1	1	0	8600	2459	0.286
19119	Lyon	IA	Iowa	1	1	0	11745	2710	0.231
19121	Madison	IA	Iowa	1	1	0	15720	3468	0.221
19123	Mahaska	IA	Iowa	1	1	0	22301	5458	0.245
19125	Marion	IA	Iowa	2	2	3	33127	7804	0.236	2601
19127	Marshall	IA	Iowa	1	1	0	40476	9549	0.236
19129	Mills	IA	Iowa	0	0	0	14933	3584	0.24
19131	Mitchell	IA	Iowa	1	1	0	10663	2990	0.28
19133	Monona	IA	Iowa	1	1	0	8865	2842	0.321
19135	Monroe	IA	Iowa	1	1	0	7912	1998	0.253
19137	Montgomery	IA	Iowa	1	1	8	10239	2863	0.28	358
19139	Muscatine	IA	Iowa	1	1	5	42923	9608	0.224	1922
19141	O'Brien	IA	Iowa	2	2	0	13944	3787	0.272
19143	Osceola	IA	Iowa	1	1	0	6149	1621	0.264
19145	Page	IA	Iowa	2	2	2	15393	4507	0.293	2254
19147	Palo Alto	IA	Iowa	1	1	0	9110	2512	0.276
19149	Plymouth	IA	Iowa	1	1	0	25027	6126	0.245
19151	Pocahontas	IA	Iowa	1	1	0	6972	2100	0.301
19153	Polk	IA	Iowa	4	4	112	467235	81860	0.175	731
19155	Pottawattamie	IA	Iowa	2	2	29	93287	21265	0.228	733
19157	Poweshiek	IA	Iowa	1	1	5	18428	4687	0.254	937
19159	Ringgold	IA	Iowa	1	1	0	4986	1529	0.307
19161	Sac	IA	Iowa	1	1	0	9936	2963	0.298
19163	Scott	IA	Iowa	2	2	46	171493	36851	0.215	801
19165	Shelby	IA	Iowa	1	1	0	11772	3381	0.287
19167	Sioux	IA	Iowa	4	4	0	34692	6858	0.198
19169	Story	IA	Iowa	2	2	14	95888	14980	0.156	1070
19171	Tama	IA	Iowa	0	0	0	17236	4455	0.258
19173	Taylor	IA	Iowa	0	0	0	6214	1749	0.281
19175	Union	IA	Iowa	1	1	4	12497	3366	0.269	842
19177	Van Buren	IA	Iowa	1	1	0	7308	2036	0.279
19179	Wapello	IA	Iowa	1	1	11	35321	8335	0.236	758
19181	Warren	IA	Iowa	0	0	0	48630	10113	0.208
19183	Washington	IA	Iowa	1	1	0	22095	5388	0.244
19185	Wayne	IA	Iowa	1	1	0	6405	1872	0.292
19187	Webster	IA	Iowa	1	1	8	36945	8966	0.243	1121
19189	Winnebago	IA	Iowa	0	0	0	10545	3095	0.294
19191	Winneshiek	IA	Iowa	1	1	0	20575	5243	0.255
19193	Woodbury	IA	Iowa	2	2	33	102397	20666	0.202	626
19195	Worth	IA	Iowa	0	0	0	7502	1990	0.265
19197	Wright	IA	Iowa	2	2	0	12864	3778	0.294
20001	Allen	KS	Kansas	1	1	0	12752	3383	0.265
20003	Anderson	KS	Kansas	1	1	0	7840	2090	0.267
20005	Atchison	KS	Kansas	1	1	4	16466	3518	0.214	880
20007	Barber	KS	Kansas	2	2	0	4905	1307	0.266
20009	Barton	KS	Kansas	3	3	4	27067	6712	0.248	1678
20011	Bourbon	KS	Kansas	0	0	0	14757	3661	0.248
20013	Brown	KS	Kansas	1	1	0	9736	2486	0.255
20015	Butler	KS	Kansas	2	2	16	66260	13403	0.202	838
20017	Chase	KS	Kansas	0	0	0	2665	837	0.314
20019	Chautauqua	KS	Kansas	1	1	0	3425	1156	0.338
20021	Cherokee	KS	Kansas	2	2	0	20501	5088	0.248
20023	Cheyenne	KS	Kansas	1	1	0	2677	911	0.34
20025	Clark	KS	Kansas	1	1	0	2089	587	0.281
20027	Clay	KS	Kansas	1	1	0	8203	2413	0.294
20029	Cloud	KS	Kansas	1	1	0	9191	2463	0.268
20031	Coffey	KS	Kansas	0	0	0	8328	2233	0.268
20033	Comanche	KS	Kansas	1	1	0	1741	582	0.334
20035	Cowley	KS	Kansas	2	2	4	35732	8333	0.233	2083
20037	Crawford	KS	Kansas	2	2	12	39099	7956	0.203	663
20039	Decatur	KS	Kansas	1	1	0	2891	989	0.342
20041	Dickinson	KS	Kansas	2	2	0	19162	4867	0.254
20043	Doniphan	KS	Kansas	0	0	0	7790	2038	0.262
20045	Douglas	KS	Kansas	1	1	10	117806	18450	0.157	1845
20047	Edwards	KS	Kansas	1	1	0	2946	782	0.265
20049	Elk	KS	Kansas	0	0	0	2581	935	0.362
20051	Ellis	KS	Kansas	1	1	34	28877	5912	0.205	174
20053	Ellsworth	KS	Kansas	1	1	0	6331	1772	0.28
20055	Finney	KS	Kansas	1	1	8	37097	5555	0.15	694
20057	Ford	KS	Kansas	2	2	10	34658	5103	0.147	510
20059	Franklin	KS	Kansas	1	1	5	25599	5593	0.218	1119
20061	Geary	KS	Kansas	1	1	6	35796	3964	0.111	661
20063	Gove	KS	Kansas	1	1	0	2632	882	0.335
20065	Graham	KS	Kansas	1	1	0	2561	862	0.337
20067	Grant	KS	Kansas	1	1	0	7716	1303	0.169
20069	Gray	KS	Kansas	0	0	0	6004	1227	0.204
20071	Greeley	KS	Kansas	1	1	0	1210	371	0.307
20073	Greenwood	KS	Kansas	1	1	0	6227	2057	0.33
20075	Hamilton	KS	Kansas	1	1	0	2621	455	0.174
20077	Harper	KS	Kansas	1	1	0	5746	1672	0.291
20079	Harvey	KS	Kansas	1	1	6	34683	8619	0.249	1437
20081	Haskell	KS	Kansas	1	1	0	4081	804	0.197
20083	Hodgeman	KS	Kansas	1	1	0	1875	577	0.308
20085	Jackson	KS	Kansas	1	1	0	13322	3473	0.261
20087	Jefferson	KS	Kansas	1	1	0	18856	4716	0.25
20089	Jewell	KS	Kansas	1	1	0	2963	1107	0.374
20091	Johnson	KS	Kansas	8	9	110	578797	110038	0.19	1000
20093	Kearny	KS	Kansas	1	1	0	3931	755	0.192
20095	Kingman	KS	Kansas	1	1	0	7576	2096	0.277
20097	Kiowa	KS	Kansas	1	1	0	2524	729	0.289
20099	Labette	KS	Kansas	2	2	5	20553	5125	0.249	1025
20101	Lane	KS	Kansas	1	1	0	1702	442	0.26
20103	Leavenworth	KS	Kansas	2	2	10	79359	15061	0.19	1506
20105	Lincoln	KS	Kansas	1	1	0	3121	944	0.302
20107	Linn	KS	Kansas	0	0	0	9602	2635	0.274
20109	Logan	KS	Kansas	1	1	0	2790	840	0.301
20111	Lyon	KS	Kansas	1	1	6	33302	6409	0.192	1068
20113	McPherson	KS	Kansas	3	3	7	28792	7540	0.262	1077
20115	Marion	KS	Kansas	2	2	0	12087	3564	0.295
20117	Marshall	KS	Kansas	1	1	0	9859	2826	0.287
20119	Meade	KS	Kansas	1	1	0	4295	1016	0.237
20121	Miami	KS	Kansas	1	1	0	32976	7544	0.229
20123	Mitchell	KS	Kansas	1	1	4	6230	1776	0.285	444
20125	Montgomery	KS	Kansas	1	1	7	33463	8712	0.26	1245
20127	Morris	KS	Kansas	1	1	0	5605	1854	0.331
20129	Morton	KS	Kansas	1	1	0	2931	666	0.227
20131	Nemaha	KS	Kansas	2	2	0	10095	2619	0.259
20133	Neosho	KS	Kansas	1	1	5	16209	4042	0.249	808
20135	Ness	KS	Kansas	2	2	0	3001	969	0.323
20137	Norton	KS	Kansas	1	1	0	5527	1317	0.238
20139	Osage	KS	Kansas	0	0	0	15894	4124	0.259
20141	Osborne	KS	Kansas	1	1	0	3684	1175	0.319
20143	Ottawa	KS	Kansas	1	1	0	5957	1490	0.25
20145	Pawnee	KS	Kansas	1	1	0	6776	1864	0.275
20147	Phillips	KS	Kansas	1	1	0	5446	1631	0.299
20149	Pottawatomie	KS	Kansas	2	2	0	23188	4546	0.196
20151	Pratt	KS	Kansas	1	1	6	9670	2512	0.26	419
20153	Rawlins	KS	Kansas	1	1	0	2520	865	0.343
20155	Reno	KS	Kansas	2	2	20	63360	15902	0.251	795
20157	Republic	KS	Kansas	1	1	0	4705	1745	0.371
20159	Rice	KS	Kansas	1	1	0	9868	2499	0.253
20161	Riley	KS	Kansas	2	2	8	75696	8478	0.112	1060
20163	Rooks	KS	Kansas	1	1	0	5148	1392	0.27
20165	Rush	KS	Kansas	1	1	0	3119	974	0.312
20167	Russell	KS	Kansas	1	1	0	6987	2235	0.32
20169	Saline	KS	Kansas	2	2	18	55334	12413	0.224	690
20171	Scott	KS	Kansas	1	1	0	4981	1338	0.269
20173	Sedgwick	KS	Kansas	6	6	236	510484	97508	0.191	413
20175	Seward	KS	Kansas	1	1	8	22948	3309	0.144	414
20177	Shawnee	KS	Kansas	2	2	52	178392	41511	0.233	798
20179	Sheridan	KS	Kansas	1	1	0	2497	725	0.29
20181	Sherman	KS	Kansas	1	1	0	5999	1592	0.265
20183	Smith	KS	Kansas	1	1	0	3693	1327	0.359
20185	Stafford	KS	Kansas	1	1	0	4251	1151	0.271
20187	Stanton	KS	Kansas	1	1	0	2107	490	0.233
20189	Stevens	KS	Kansas	1	1	0	5741	1076	0.187
20191	Sumner	KS	Kansas	2	2	0	23336	5525	0.237
20193	Thomas	KS	Kansas	1	1	1	7847	1833	0.234	1833
20195	Trego	KS	Kansas	1	1	0	2899	892	0.308
20197	Wabaunsee	KS	Kansas	0	0	0	6918	1733	0.251
20199	Wallace	KS	Kansas	0	0	0	1591	421	0.265
20201	Washington	KS	Kansas	2	2	0	5572	1719	0.309
20203	Wichita	KS	Kansas	1	1	0	2157	537	0.249
20205	Wilson	KS	Kansas	2	2	0	8858	2497	0.282
20207	Woodson	KS	Kansas	0	0	0	3178	1025	0.323
20209	Wyandotte	KS	Kansas	2	2	145	163227	27635	0.169	191
21001	Adair	KY	Kentucky	1	1	0	19304	4558	0.236
21003	Allen	KY	Kentucky	1	1	0	20628	4783	0.232
21005	Anderson	KY	Kentucky	0	0	0	22017	4689	0.213
21007	Ballard	KY	Kentucky	0	0	0	8152	2211	0.271
21009	Barren	KY	Kentucky	1	1	10	43418	9933	0.229	993
21011	Bath	KY	Kentucky	0	0	0	12189	2815	0.231
21013	Bell	KY	Kentucky	2	2	7	27469	6714	0.244	959
21015	Boone	KY	Kentucky	1	1	18	127682	22880	0.179	1271
21017	Bourbon	KY	Kentucky	1	1	4	20017	4949	0.247	1237
21019	Boyd	KY	Kentucky	2	2	50	48486	12601	0.26	252
21021	Boyle	KY	Kentucky	1	1	22	29773	7324	0.246	333
21023	Bracken	KY	Kentucky	0	0	0	8330	1834	0.22
21025	Breathitt	KY	Kentucky	1	1	4	13276	2950	0.222	738
21027	Breckinridge	KY	Kentucky	1	1	0	19991	5162	0.258
21029	Bullitt	KY	Kentucky	0	0	0	78622	16484	0.21
21031	Butler	KY	Kentucky	0	0	0	12735	3036	0.238
21033	Caldwell	KY	Kentucky	1	1	0	12747	3148	0.247
21035	Calloway	KY	Kentucky	1	1	10	38616	8253	0.214	825
21037	Campbell	KY	Kentucky	1	1	21	91804	19251	0.21	917
21039	Carlisle	KY	Kentucky	0	0	0	4890	1333	0.273
21041	Carroll	KY	Kentucky	1	1	0	10695	2153	0.201
21043	Carter	KY	Kentucky	0	0	0	27385	6600	0.241
21045	Casey	KY	Kentucky	1	1	0	15805	4012	0.254
21047	Christian	KY	Kentucky	1	1	18	72438	11300	0.156	628
21049	Clark	KY	Kentucky	1	1	8	35757	8552	0.239	1069
21051	Clay	KY	Kentucky	1	1	6	20866	4137	0.198	690
21053	Clinton	KY	Kentucky	1	1	0	10208	2661	0.261
21055	Crittenden	KY	Kentucky	1	1	0	9154	2418	0.264
21057	Cumberland	KY	Kentucky	1	1	0	6744	1807	0.268
21059	Daviess	KY	Kentucky	1	1	32	99258	22152	0.223	692
21061	Edmonson	KY	Kentucky	0	0	0	12063	3138	0.26
21063	Elliott	KY	Kentucky	0	0	0	7533	1799	0.239
21065	Estill	KY	Kentucky	1	1	0	14382	3491	0.243
21067	Fayette	KY	Kentucky	4	4	260	315109	55235	0.175	212
21069	Fleming	KY	Kentucky	1	1	3	14515	3347	0.231	1116
21071	Floyd	KY	Kentucky	3	3	16	37447	8825	0.236	552
21073	Franklin	KY	Kentucky	1	1	10	49969	11999	0.24	1200
21075	Fulton	KY	Kentucky	0	0	0	6259	1667	0.266
21077	Gallatin	KY	Kentucky	0	0	0	8652	1693	0.196
21079	Garrard	KY	Kentucky	0	0	0	17226	4077	0.237
21081	Grant	KY	Kentucky	1	1	0	24800	4489	0.181
21083	Graves	KY	Kentucky	1	1	8	37259	8947	0.24	1118
21085	Grayson	KY	Kentucky	1	1	6	26129	6066	0.232	1011
21087	Green	KY	Kentucky	1	1	0	11044	3113	0.282
21089	Greenup	KY	Kentucky	0	0	0	36012	9521	0.264
21091	Hancock	KY	Kentucky	0	0	0	8700	1996	0.229
21093	Hardin	KY	Kentucky	1	1	20	107699	19472	0.181	974
21095	Harlan	KY	Kentucky	1	1	7	27548	6579	0.239	940
21097	Harrison	KY	Kentucky	1	1	6	18630	4370	0.235	728
21099	Hart	KY	Kentucky	1	1	0	18531	4124	0.223
21101	Henderson	KY	Kentucky	1	1	12	46252	10871	0.235	906
21103	Henry	KY	Kentucky	0	0	0	15677	3627	0.231
21105	Hickman	KY	Kentucky	0	0	0	4625	1387	0.3
21107	Hopkins	KY	Kentucky	1	1	19	45985	11048	0.24	581
21109	Jackson	KY	Kentucky	0	0	0	13369	3018	0.226
21111	Jefferson	KY	Kentucky	4	4	366	764378	161771	0.212	442
21113	Jessamine	KY	Kentucky	0	0	0	51667	10163	0.197
21115	Johnson	KY	Kentucky	1	1	6	23064	5441	0.236	907
21117	Kenton	KY	Kentucky	1	1	54	163987	31245	0.191	579
21119	Knott	KY	Kentucky	0	0	0	15690	3700	0.236
21121	Knox	KY	Kentucky	1	1	4	31424	7187	0.229	1797
21123	Larue	KY	Kentucky	0	0	0	14102	3193	0.226
21125	Laurel	KY	Kentucky	1	1	14	59901	12999	0.217	929
21127	Lawrence	KY	Kentucky	1	1	6	15844	3685	0.233	614
21129	Lee	KY	Kentucky	0	0	0	6717	1622	0.241
21131	Leslie	KY	Kentucky	1	1	0	10648	2421	0.227
21133	Letcher	KY	Kentucky	1	1	6	23011	5498	0.239	916
21135	Lewis	KY	Kentucky	0	0	0	13565	3211	0.237
21137	Lincoln	KY	Kentucky	1	1	0	24413	5718	0.234
21139	Livingston	KY	Kentucky	1	1	0	9288	2565	0.276
21141	Logan	KY	Kentucky	1	1	6	26847	6256	0.233	1043
21143	Lyon	KY	Kentucky	0	0	0	8268	2744	0.332
21145	McCracken	KY	Kentucky	2	2	58	65285	16639	0.255	287
21147	McCreary	KY	Kentucky	0	0	0	17748	3649	0.206
21149	McLean	KY	Kentucky	0	0	0	9361	2342	0.25
21151	Madison	KY	Kentucky	2	2	12	88376	16155	0.183	1346
21153	Magoffin	KY	Kentucky	0	0	0	12783	2681	0.21
21155	Marion	KY	Kentucky	1	1	6	19335	4112	0.213	685
21157	Marshall	KY	Kentucky	1	1	4	31177	8929	0.286	2232
21159	Martin	KY	Kentucky	0	0	0	12175	2520	0.207
21161	Mason	KY	Kentucky	1	1	5	17167	4041	0.235	808
21163	Meade	KY	Kentucky	0	0	0	28452	5153	0.181
21165	Menifee	KY	Kentucky	0	0	0	6381	1692	0.265
21167	Mercer	KY	Kentucky	1	1	4	21378	5365	0.251	1341
21169	Metcalfe	KY	Kentucky	0	0	0	9990	2518	0.252
21171	Monroe	KY	Kentucky	1	1	0	10645	2575	0.242
21173	Montgomery	KY	Kentucky	1	1	4	27550	5851	0.212	1463
21175	Morgan	KY	Kentucky	1	1	0	13281	3148	0.237
21177	Muhlenberg	KY	Kentucky	1	1	6	31153	7703	0.247	1284
21179	Nelson	KY	Kentucky	1	1	4	45131	9073	0.201	2268
21181	Nicholas	KY	Kentucky	0	0	0	7061	1716	0.243
21183	Ohio	KY	Kentucky	1	1	4	24062	5824	0.242	1456
21185	Oldham	KY	Kentucky	1	1	8	64633	11255	0.174	1407
21187	Owen	KY	Kentucky	0	0	0	10686	2733	0.256
21189	Owsley	KY	Kentucky	0	0	0	4497	1077	0.239
21191	Pendleton	KY	Kentucky	0	0	0	14530	2966	0.204
21193	Perry	KY	Kentucky	1	1	32	27329	6143	0.225	192
21195	Pike	KY	Kentucky	2	2	76	61586	14290	0.232	188
21197	Powell	KY	Kentucky	0	0	0	12349	2502	0.203
21199	Pulaski	KY	Kentucky	1	1	38	63974	15846	0.248	417
21201	Robertson	KY	Kentucky	0	0	0	2161	601	0.278
21203	Rockcastle	KY	Kentucky	1	1	0	16815	4047	0.241
21205	Rowan	KY	Kentucky	1	1	10	24392	4411	0.181	441
21207	Russell	KY	Kentucky	1	1	2	17731	4680	0.264	2340
21209	Scott	KY	Kentucky	1	1	6	52322	8436	0.161	1406
21211	Shelby	KY	Kentucky	1	1	4	45831	9425	0.206	2356
21213	Simpson	KY	Kentucky	1	1	0	17881	3934	0.22
21215	Spencer	KY	Kentucky	0	0	0	18012	3154	0.175
21217	Taylor	KY	Kentucky	1	1	8	25406	5890	0.232	736
21219	Todd	KY	Kentucky	0	0	0	12377	2555	0.206
21221	Trigg	KY	Kentucky	1	1	0	14286	4271	0.299
21223	Trimble	KY	Kentucky	0	0	0	8697	2046	0.235
21225	Union	KY	Kentucky	1	1	0	14915	3262	0.219
21227	Warren	KY	Kentucky	2	2	52	123824	21484	0.174	413
21229	Washington	KY	Kentucky	0	0	0	11999	2857	0.238
21231	Wayne	KY	Kentucky	1	1	0	20692	5282	0.255
21233	Webster	KY	Kentucky	0	0	0	13180	3120	0.237
21235	Whitley	KY	Kentucky	1	1	10	36027	8053	0.224	805
21237	Wolfe	KY	Kentucky	0	0	0	7251	1797	0.248
21239	Woodford	KY	Kentucky	1	1	0	25817	6129	0.237
22001	Acadia	LA	Louisiana	2	2	4	62607	12138	0.194	3035
22003	Allen	LA	Louisiana	2	2	3	25667	4916	0.192	1639
22005	Ascension	LA	Louisiana	1	1	0	119129	18726	0.157
22007	Assumption	LA	Louisiana	1	1	0	22881	5211	0.228
22009	Avoyelles	LA	Louisiana	2	2	2	41095	9096	0.221	4548
22011	Beauregard	LA	Louisiana	1	1	6	36598	7788	0.213	1298
22013	Bienville	LA	Louisiana	1	1	0	13806	3706	0.268
22015	Bossier	LA	Louisiana	0	0	0	125698	23653	0.188
22017	Caddo	LA	Louisiana	5	5	107	251069	54633	0.218	511
22019	Calcasieu	LA	Louisiana	5	5	75	198753	39284	0.198	524
22021	Caldwell	LA	Louisiana	2	2	0	10000	2320	0.232
22023	Cameron	LA	Louisiana	1	1	0	6806	1649	0.242
22025	Catahoula	LA	Louisiana	0	0	0	10044	2388	0.238
22027	Claiborne	LA	Louisiana	1	1	4	16296	3960	0.243	990
22029	Concordia	LA	Louisiana	1	1	5	20211	4548	0.225	910
22031	De Soto	LA	Louisiana	1	1	0	27164	6289	0.232
22033	East Baton Rouge	LA	Louisiana	7	7	124	446167	81150	0.182	654
22035	East Carroll	LA	Louisiana	1	1	0	7318	1369	0.187
22037	East Feliciana	LA	Louisiana	0	0	0	19553	4704	0.241
22039	Evangeline	LA	Louisiana	2	2	24	33750	6942	0.206	289
22041	Franklin	LA	Louisiana	1	1	6	20388	4672	0.229	779
22043	Grant	LA	Louisiana	0	0	0	22305	4423	0.198
22045	Iberia	LA	Louisiana	1	1	11	73346	14679	0.2	1334
22047	Iberville	LA	Louisiana	0	0	0	33122	6966	0.21
22049	Jackson	LA	Louisiana	1	1	0	15952	3997	0.251
22051	Jefferson	LA	Louisiana	5	5	215	437038	96599	0.221	449
22053	Jefferson Davis	LA	Louisiana	1	1	5	31405	6940	0.221	1388
22055	Lafayette	LA	Louisiana	7	7	80	238230	41592	0.175	520
22057	Lafourche	LA	Louisiana	3	3	21	98112	19612	0.2	934
22059	LaSalle	LA	Louisiana	2	2	0	14930	3353	0.225
22061	Lincoln	LA	Louisiana	1	1	17	47536	8335	0.175	490
22063	Livingston	LA	Louisiana	0	0	0	137096	24235	0.177
22065	Madison	LA	Louisiana	1	1	0	11616	2251	0.194
22067	Morehouse	LA	Louisiana	1	1	12	26290	6321	0.24	527
22069	Natchitoches	LA	Louisiana	1	1	8	39051	8279	0.212	1035
22071	Orleans	LA	Louisiana	5	5	111	388182	74618	0.192	672
22073	Ouachita	LA	Louisiana	4	4	88	156433	30466	0.195	346
22075	Plaquemines	LA	Louisiana	0	0	0	23394	4024	0.172
22077	Pointe Coupee	LA	Louisiana	1	1	0	22271	5833	0.262
22079	Rapides	LA	Louisiana	3	3	26	132080	27820	0.211	1070
22081	Red River	LA	Louisiana	1	1	0	8723	2085	0.239
22083	Richland	LA	Louisiana	2	2	2	20619	4470	0.217	2235
22085	Sabine	LA	Louisiana	1	1	0	24145	6342	0.263
22087	St. Bernard	LA	Louisiana	1	1	8	45067	6771	0.15	846
22089	St. Charles	LA	Louisiana	1	1	8	52728	9258	0.176	1157
22091	St. Helena	LA	Louisiana	1	1	0	10509	2784	0.265
22093	St. James	LA	Louisiana	1	1	0	21485	4921	0.229
22095	St. John the Baptist	LA	Louisiana	0	0	0	43565	8070	0.185
22097	St. Landry	LA	Louisiana	1	1	16	83580	17636	0.211	1102
22099	St. Martin	LA	Louisiana	1	1	0	53609	10425	0.194
22101	St. Mary	LA	Louisiana	2	2	15	52578	11173	0.213	745
22103	St. Tammany	LA	Louisiana	6	6	149	249201	55158	0.221	370
22105	Tangipahoa	LA	Louisiana	4	4	64	128850	24738	0.192	387
22107	Tensas	LA	Louisiana	0	0	0	4771	1350	0.283
22109	Terrebonne	LA	Louisiana	3	3	26	113067	21180	0.187	815
22111	Union	LA	Louisiana	2	2	0	22537	6027	0.267
22113	Vermilion	LA	Louisiana	2	2	6	59841	11580	0.194	1930
22115	Vernon	LA	Louisiana	1	1	7	51906	7791	0.15	1113
22117	Washington	LA	Louisiana	2	2	13	46449	11494	0.247	884
22119	Webster	LA	Louisiana	2	2	16	40043	10020	0.25	626
22121	West Baton Rouge	LA	Louisiana	0	0	0	25518	4884	0.191
22123	West Carroll	LA	Louisiana	1	1	0	11274	2783	0.247
22125	West Feliciana	LA	Louisiana	1	1	0	15376	3049	0.198
22127	Winn	LA	Louisiana	1	1	5	14631	3354	0.229	671
23001	Androscoggin	ME	Maine	2	2	54	107317	24289	0.226	450
23003	Aroostook	ME	Maine	4	4	12	68840	20453	0.297	1704
23005	Cumberland	ME	Maine	4	4	72	289173	68027	0.235	945
23007	Franklin	ME	Maine	1	1	5	30177	8571	0.284	1714
23009	Hancock	ME	Maine	3	3	6	54468	16940	0.311	2823
23011	Kennebec	ME	Maine	2	2	16	121289	31337	0.258	1959
23013	Knox	ME	Maine	1	1	8	39700	12268	0.309	1534
23015	Lincoln	ME	Maine	1	1	4	34021	11973	0.352	2993
23017	Oxford	ME	Maine	2	2	6	57230	16027	0.28	2671
23019	Penobscot	ME	Maine	4	4	51	152284	36356	0.239	713
23021	Piscataquis	ME	Maine	2	2	0	16960	5761	0.34
23023	Sagadahoc	ME	Maine	0	0	0	35149	9471	0.269
23025	Somerset	ME	Maine	2	2	4	50994	13707	0.269	3427
23027	Waldo	ME	Maine	1	1	4	39280	11094	0.282	2774
23029	Washington	ME	Maine	2	2	0	31822	9959	0.313
23031	York	ME	Maine	2	2	14	201454	52544	0.261	3753
24001	Allegany	MD	Maryland	1	1	15	72591	18311	0.252	1221
24003	Anne Arundel	MD	Maryland	2	2	53	564600	111090	0.197	2096
24005	Baltimore	MD	Maryland	5	5	123	828637	186412	0.225	1516
24009	Calvert	MD	Maryland	1	1	4	90824	18153	0.2	4538
24011	Caroline	MD	Maryland	0	0	0	32785	6877	0.21
24013	Carroll	MD	Maryland	1	1	10	167319	36730	0.22	3673
24015	Cecil	MD	Maryland	1	1	5	102416	21069	0.206	4214
24017	Charles	MD	Maryland	1	1	10	156021	26064	0.167	2606
24019	Dorchester	MD	Maryland	0	0	0	32386	8893	0.275
24021	Frederick	MD	Maryland	1	1	18	246105	46881	0.19	2605
24023	Garrett	MD	Maryland	1	1	2	29516	8442	0.286	4221
24025	Harford	MD	Maryland	2	2	19	250132	53295	0.213	2805
24027	Howard	MD	Maryland	1	1	16	312495	57302	0.183	3581
24029	Kent	MD	Maryland	1	1	6	19666	6220	0.316	1037
24031	Montgomery	MD	Maryland	6	6	150	1039198	209461	0.202	1396
24033	Prince George's	MD	Maryland	5	5	89	905161	159437	0.176	1791
24035	Queen Anne's	MD	Maryland	0	0	0	49071	12065	0.246
24037	St. Mary's	MD	Maryland	1	1	12	110979	18983	0.171	1582
24039	Somerset	MD	Maryland	1	1	0	25801	5570	0.216
24041	Talbot	MD	Maryland	1	1	16	37461	12868	0.344	804
24043	Washington	MD	Maryland	1	1	48	149546	33148	0.222	691
24045	Wicomico	MD	Maryland	1	1	24	102014	21277	0.209	887
24047	Worcester	MD	Maryland	1	1	6	51559	17655	0.342	2943
24510	Baltimore City	MD	Maryland	12	12	508	619796	115716	0.187	228
25001	Barnstable	MA	Massachusetts	2	2	34	213900	80676	0.377	2373
25003	Berkshire	MA	Massachusetts	2	2	24	127751	37339	0.292	1556
25005	Bristol	MA	Massachusetts	4	4	96	557016	124173	0.223	1293
25007	Dukes	MA	Massachusetts	1	1	0	17275	5109	0.296
25009	Essex	MA	Massachusetts	5	5	98	775860	173485	0.224	1770
25011	Franklin	MA	Massachusetts	1	1	6	70926	19773	0.279	3296
25013	Hampden	MA	Massachusetts	5	5	119	469188	103567	0.221	870
25015	Hampshire	MA	Massachusetts	1	1	11	161197	34945	0.217	3177
25017	Middlesex	MA	Massachusetts	11	11	216	1582857	319971	0.202	1481
25019	Nantucket	MA	Massachusetts	1	1	0	10912	2283	0.209
25021	Norfolk	MA	Massachusetts	4	4	59	694389	155147	0.223	2630
25023	Plymouth	MA	Massachusetts	3	3	47	509114	119899	0.236	2551
25025	Suffolk	MA	Massachusetts	10	10	447	780685	125537	0.161	281
25027	Worcester	MA	Massachusetts	8	8	169	818249	170081	0.208	1006
26001	Alcona	MI	Michigan	0	0	0	10413	4705	0.452
26003	Alger	MI	Michigan	1	1	0	9254	3126	0.338
26005	Allegan	MI	Michigan	1	1	0	114145	24717	0.217
26007	Alpena	MI	Michigan	1	1	9	28730	8520	0.297	947
26009	Antrim	MI	Michigan	0	0	0	23133	8100	0.35
26011	Arenac	MI	Michigan	1	1	5	15238	4939	0.324	988
26013	Baraga	MI	Michigan	1	1	0	8580	2373	0.277
26015	Barry	MI	Michigan	0	1	0	59607	14931	0.25
26017	Bay	MI	Michigan	1	1	32	105350	27300	0.259	853
26019	Benzie	MI	Michigan	1	1	0	17462	5771	0.33
26021	Berrien	MI	Michigan	2	2	20	154948	39067	0.252	1953
26023	Branch	MI	Michigan	1	1	10	43543	10379	0.238	1038
26025	Calhoun	MI	Michigan	2	2	32	134327	31227	0.232	976
26027	Cass	MI	Michigan	1	1	0	51397	13966	0.272
26029	Charlevoix	MI	Michigan	1	1	0	26160	8123	0.311
26031	Cheboygan	MI	Michigan	0	0	0	25475	8824	0.346
26033	Chippewa	MI	Michigan	1	1	6	38023	8659	0.228	1443
26035	Clare	MI	Michigan	1	1	0	30597	9532	0.312
26037	Clinton	MI	Michigan	1	1	2	77321	16938	0.219	8469
26039	Crawford	MI	Michigan	1	1	6	13821	4436	0.321	739
26041	Delta	MI	Michigan	1	1	9	36395	10991	0.302	1221
26043	Dickinson	MI	Michigan	1	1	6	25694	7463	0.29	1244
26045	Eaton	MI	Michigan	2	2	0	108586	26110	0.24
26047	Emmet	MI	Michigan	1	1	58	32978	9255	0.281	160
26049	Genesee	MI	Michigan	3	3	151	410881	93094	0.227	617
26051	Gladwin	MI	Michigan	1	1	0	25324	8522	0.337
26053	Gogebic	MI	Michigan	1	1	5	15577	5016	0.322	1003
26055	Grand Traverse	MI	Michigan	1	1	20	91222	23009	0.252	1150
26057	Gratiot	MI	Michigan	1	1	0	41319	9162	0.222
26059	Hillsdale	MI	Michigan	1	1	4	45909	11598	0.253	2900
26061	Houghton	MI	Michigan	2	2	5	36333	8122	0.224	1624
26063	Huron	MI	Michigan	3	3	4	31750	10169	0.32	2542
26065	Ingham	MI	Michigan	2	2	219	286185	51447	0.18	235
26067	Ionia	MI	Michigan	1	1	2	64147	12876	0.201	6438
26069	Iosco	MI	Michigan	1	1	4	25317	9417	0.372	2354
26071	Iron	MI	Michigan	1	1	3	11291	4274	0.379	1425
26073	Isabella	MI	Michigan	1	1	8	70572	11665	0.165	1458
26075	Jackson	MI	Michigan	1	1	51	158989	36118	0.227	708
26077	Kalamazoo	MI	Michigan	1	2	34	259830	51450	0.198	1513
26079	Kalkaska	MI	Michigan	1	1	0	17358	4698	0.271
26081	Kent	MI	Michigan	3	3	150	636376	115828	0.182	772
26083	Keweenaw	MI	Michigan	0	0	0	2136	907	0.425
26085	Lake	MI	Michigan	0	0	0	11669	4182	0.358
26087	Lapeer	MI	Michigan	1	1	10	88205	20857	0.236	2086
26089	Leelanau	MI	Michigan	0	0	0	21564	8279	0.384
26091	Lenawee	MI	Michigan	1	2	0	98585	23897	0.242
26093	Livingston	MI	Michigan	2	2	8	186946	41663	0.223	5208
26095	Luce	MI	Michigan	1	1	0	6406	1804	0.282
26097	Mackinac	MI	Michigan	1	1	0	10836	3817	0.352
26099	Macomb	MI	Michigan	4	4	122	864019	192977	0.223	1582
26101	Manistee	MI	Michigan	1	1	0	24432	8002	0.328
26103	Marquette	MI	Michigan	2	2	30	67145	16470	0.245	549
26105	Mason	MI	Michigan	1	1	6	28800	8675	0.301	1446
26107	Mecosta	MI	Michigan	1	1	4	43181	10289	0.238	2572
26109	Menominee	MI	Michigan	0	0	0	23389	7186	0.307
26111	Midland	MI	Michigan	1	1	26	83489	19242	0.23	740
26113	Missaukee	MI	Michigan	0	0	0	14982	4031	0.269
26115	Monroe	MI	Michigan	0	1	0	149619	35206	0.235
26117	Montcalm	MI	Michigan	4	4	12	62956	14301	0.227	1192
26119	Montmorency	MI	Michigan	0	0	0	9290	3665	0.395
26121	Muskegon	MI	Michigan	1	1	37	172707	37993	0.22	1027
26123	Newaygo	MI	Michigan	1	1	9	47899	12202	0.255	1356
26125	Oakland	MI	Michigan	12	12	409	1241860	273867	0.221	670
26127	Oceana	MI	Michigan	1	1	0	26317	7218	0.274
26129	Ogemaw	MI	Michigan	1	1	10	20979	6773	0.323	677
26131	Ontonagon	MI	Michigan	1	1	0	6072	2710	0.446
26133	Osceola	MI	Michigan	1	1	4	23221	6243	0.269	1561
26135	Oscoda	MI	Michigan	0	0	0	8304	2898	0.349
26137	Otsego	MI	Michigan	1	1	4	24247	6554	0.27	1639
26139	Ottawa	MI	Michigan	3	3	22	280243	54457	0.194	2475
26141	Presque Isle	MI	Michigan	0	0	0	12854	5142	0.4
26143	Roscommon	MI	Michigan	0	0	0	23934	9877	0.413
26145	Saginaw	MI	Michigan	3	3	133	193803	47390	0.245	356
26147	St. Clair	MI	Michigan	3	3	23	159761	38914	0.244	1692
26149	St. Joseph	MI	Michigan	2	2	8	60890	14461	0.237	1808
26151	Sanilac	MI	Michigan	3	3	0	41535	11385	0.274
26153	Schoolcraft	MI	Michigan	1	1	0	8114	2847	0.351
26155	Shiawassee	MI	Michigan	1	1	7	68617	16363	0.238	2338
26157	Tuscola	MI	Michigan	2	2	0	53569	14012	0.262
26159	Van Buren	MI	Michigan	2	2	0	75190	18230	0.242
26161	Washtenaw	MI	Michigan	4	4	92	361509	65781	0.182	715
26163	Wayne	MI	Michigan	14	14	586	1763822	362535	0.206	619
26165	Wexford	MI	Michigan	1	1	6	32915	8300	0.252	1383
27001	Aitkin	MN	Minnesota	1	1	4	15841	6467	0.408	1617
27003	Anoka	MN	Minnesota	1	1	35	344861	63313	0.184	1809
27005	Becker	MN	Minnesota	1	1	8	33552	9157	0.273	1145
27007	Beltrami	MN	Minnesota	2	2	10	45847	9482	0.207	948
27009	Benton	MN	Minnesota	0	0	0	39360	7326	0.186
27011	Big Stone	MN	Minnesota	2	2	0	5039	1693	0.336
27013	Blue Earth	MN	Minnesota	1	1	29	65767	12070	0.184	416
27015	Brown	MN	Minnesota	3	3	0	25243	6857	0.272
27017	Carlton	MN	Minnesota	2	2	6	35408	8198	0.232	1366
27019	Carver	MN	Minnesota	1	1	25	98799	15454	0.156	618
27021	Cass	MN	Minnesota	1	1	0	28810	9475	0.329
27023	Chippewa	MN	Minnesota	1	1	0	12040	3359	0.279
27025	Chisago	MN	Minnesota	1	1	10	54297	10806	0.199	1081
27027	Clay	MN	Minnesota	0	0	0	62040	10982	0.177
27029	Clearwater	MN	Minnesota	1	1	0	8824	2327	0.264
27031	Cook	MN	Minnesota	1	1	0	5270	1941	0.368
27033	Cottonwood	MN	Minnesota	2	2	0	11437	3290	0.288
27035	Crow Wing	MN	Minnesota	2	2	16	63505	17980	0.283	1124
27037	Dakota	MN	Minnesota	2	2	12	414655	76445	0.184	6370
27039	Dodge	MN	Minnesota	0	0	0	20485	4015	0.196
27041	Douglas	MN	Minnesota	1	1	8	36891	10617	0.288	1327
27043	Faribault	MN	Minnesota	1	1	4	13966	4173	0.299	1043
27045	Fillmore	MN	Minnesota	0	0	0	20825	5688	0.273
27047	Freeborn	MN	Minnesota	1	1	18	30619	8707	0.284	484
27049	Goodhue	MN	Minnesota	2	2	4	46138	11621	0.252	2905
27051	Grant	MN	Minnesota	1	1	0	5923	1742	0.294
27053	Hennepin	MN	Minnesota	8	8	311	1224763	229263	0.187	737
27055	Houston	MN	Minnesota	0	0	0	18709	5202	0.278
27057	Hubbard	MN	Minnesota	1	1	0	20743	6829	0.329
27059	Isanti	MN	Minnesota	1	1	0	38584	8001	0.207
27061	Itasca	MN	Minnesota	3	3	9	45237	13673	0.302	1519
27063	Jackson	MN	Minnesota	1	1	0	10104	2709	0.268
27065	Kanabec	MN	Minnesota	1	1	4	15948	4382	0.275	1096
27067	Kandiyohi	MN	Minnesota	1	1	8	42577	10445	0.245	1306
27069	Kittson	MN	Minnesota	1	1	0	4384	1407	0.321
27071	Koochiching	MN	Minnesota	1	1	0	12776	3913	0.306
27073	Lac qui Parle	MN	Minnesota	2	2	0	6840	2313	0.338
27075	Lake	MN	Minnesota	1	1	0	10578	3602	0.341
27077	Lake of the Woods	MN	Minnesota	1	1	0	3841	1232	0.321
27079	Le Sueur	MN	Minnesota	1	1	0	27810	6343	0.228
27081	Lincoln	MN	Minnesota	2	2	0	5724	1776	0.31
27083	Lyon	MN	Minnesota	2	2	0	25789	5263	0.204
27085	McLeod	MN	Minnesota	2	2	6	35816	8587	0.24	1431
27087	Mahnomen	MN	Minnesota	1	1	0	5500	1271	0.231
27089	Marshall	MN	Minnesota	1	1	0	9397	2567	0.273
27091	Martin	MN	Minnesota	1	1	0	20084	5976	0.298
27093	Meeker	MN	Minnesota	1	1	0	23105	6003	0.26
27095	Mille Lacs	MN	Minnesota	2	2	4	25635	6127	0.239	1532
27097	Morrison	MN	Minnesota	1	1	6	32880	8184	0.249	1364
27099	Mower	MN	Minnesota	0	0	0	39386	9579	0.243
27101	Murray	MN	Minnesota	1	1	0	8394	2671	0.318
27103	Nicollet	MN	Minnesota	1	1	0	33477	6976	0.208
27105	Nobles	MN	Minnesota	1	1	0	21854	4637	0.212
27107	Norman	MN	Minnesota	1	1	0	6589	1823	0.277
27109	Olmsted	MN	Minnesota	2	2	218	151685	29861	0.197	137
27111	Otter Tail	MN	Minnesota	2	2	5	57790	17615	0.305	3523
27113	Pennington	MN	Minnesota	1	1	0	14197	3528	0.249
27115	Pine	MN	Minnesota	1	1	0	29057	7541	0.26
27117	Pipestone	MN	Minnesota	1	1	0	9229	2504	0.271
27119	Polk	MN	Minnesota	2	2	5	31564	7554	0.239	1511
27121	Pope	MN	Minnesota	1	1	0	10932	3343	0.306
27123	Ramsey	MN	Minnesota	4	4	135	537893	102817	0.191	762
27125	Red Lake	MN	Minnesota	0	0	0	4017	1029	0.256
27127	Redwood	MN	Minnesota	1	1	0	15430	4318	0.28
27129	Renville	MN	Minnesota	1	1	0	14798	4088	0.276
27131	Rice	MN	Minnesota	2	2	4	65251	13206	0.202	3302
27133	Rock	MN	Minnesota	1	1	0	9433	2496	0.265
27135	Roseau	MN	Minnesota	1	1	0	15537	3493	0.225
27137	St. Louis	MN	Minnesota	8	8	179	200294	50288	0.251	281
27139	Scott	MN	Minnesota	2	2	0	141463	20208	0.143
27141	Sherburne	MN	Minnesota	0	0	0	92024	13888	0.151
27143	Sibley	MN	Minnesota	1	1	0	14888	3491	0.234
27145	Stearns	MN	Minnesota	4	4	41	155300	30193	0.194	736
27147	Steele	MN	Minnesota	1	1	0	36612	8393	0.229
27149	Stevens	MN	Minnesota	1	1	0	9759	2143	0.22
27151	Swift	MN	Minnesota	2	2	0	9448	2663	0.282
27153	Todd	MN	Minnesota	2	2	3	24423	6859	0.281	2286
27155	Traverse	MN	Minnesota	1	1	0	3357	1101	0.328
27157	Wabasha	MN	Minnesota	2	2	0	21490	5929	0.276
27159	Wadena	MN	Minnesota	1	1	2	13626	3789	0.278	1895
27161	Waseca	MN	Minnesota	1	1	0	18898	4286	0.227
27163	Washington	MN	Minnesota	2	2	31	250979	49212	0.196	1587
27165	Watonwan	MN	Minnesota	2	2	0	10936	2839	0.26
27167	Wilkin	MN	Minnesota	1	1	0	6398	1726	0.27
27169	Winona	MN	Minnesota	1	1	8	50992	10914	0.214	1364
27171	Wright	MN	Minnesota	2	2	3	131130	22152	0.169	7384
27173	Yellow Medicine	MN	Minnesota	2	2	0	9930	2657	0.268
28001	Adams	MS	Mississippi	1	1	15	31583	7493	0.237	500
28003	Alcorn	MS	Mississippi	1	1	24	37242	8512	0.229	355
28005	Amite	MS	Mississippi	0	0	0	12574	3755	0.299
28007	Attala	MS	Mississippi	1	1	0	18731	4680	0.25
28009	Benton	MS	Mississippi	0	0	0	8306	2049	0.247
28011	Bolivar	MS	Mississippi	1	1	8	33121	6690	0.202	836
28013	Calhoun	MS	Mississippi	1	1	0	14617	3727	0.255
28015	Carroll	MS	Mississippi	0	0	0	10221	2872	0.281
28017	Chickasaw	MS	Mississippi	1	1	0	17305	3982	0.23
28019	Choctaw	MS	Mississippi	1	1	0	8360	2362	0.283
28021	Claiborne	MS	Mississippi	1	1	0	9106	1890	0.208
28023	Clarke	MS	Mississippi	1	1	0	16089	4038	0.251
28025	Clay	MS	Mississippi	1	1	6	19990	4730	0.237	788
28027	Coahoma	MS	Mississippi	1	1	10	24296	4799	0.198	480
28029	Copiah	MS	Mississippi	1	1	0	28748	6493	0.226
28031	Covington	MS	Mississippi	1	1	0	19172	4312	0.225
28033	DeSoto	MS	Mississippi	2	2	44	173267	29708	0.171	675
28035	Forrest	MS	Mississippi	1	1	48	75835	13870	0.183	289
28037	Franklin	MS	Mississippi	1	1	0	7772	2064	0.266
28039	George	MS	Mississippi	1	1	6	23545	4774	0.203	796
28041	Greene	MS	Mississippi	2	2	0	13801	2497	0.181
28043	Grenada	MS	Mississippi	1	1	5	21379	4746	0.222	949
28045	Hancock	MS	Mississippi	1	1	6	46277	11941	0.258	1990
28047	Harrison	MS	Mississippi	3	3	57	200491	38987	0.194	684
28049	Hinds	MS	Mississippi	5	5	218	243249	44090	0.181	202
28051	Holmes	MS	Mississippi	1	1	0	18267	3568	0.195
28053	Humphreys	MS	Mississippi	0	0	0	8678	1849	0.213
28055	Issaquena	MS	Mississippi	0	0	0	1296	285	0.22
28057	Itawamba	MS	Mississippi	0	0	0	23439	5355	0.228
28059	Jackson	MS	Mississippi	1	1	48	141314	28610	0.202	596
28061	Jasper	MS	Mississippi	1	1	0	16547	4371	0.264
28063	Jefferson	MS	Mississippi	1	1	0	7463	1641	0.22
28065	Jefferson Davis	MS	Mississippi	1	1	0	11639	3162	0.272
28067	Jones	MS	Mississippi	1	1	14	68328	14853	0.217	1061
28069	Kemper	MS	Mississippi	1	1	0	10082	2367	0.235
28071	Lafayette	MS	Mississippi	1	1	24	52744	8639	0.164	360
28073	Lamar	MS	Mississippi	1	1	17	60517	10854	0.179	638
28075	Lauderdale	MS	Mississippi	4	4	51	78221	17686	0.226	347
28077	Lawrence	MS	Mississippi	1	1	0	12659	3005	0.237
28079	Leake	MS	Mississippi	1	1	0	22936	4515	0.197
28081	Lee	MS	Mississippi	1	1	42	84840	16183	0.191	385
28083	Leflore	MS	Mississippi	1	1	9	30113	5674	0.188	630
28085	Lincoln	MS	Mississippi	1	1	5	34542	7781	0.225	1556
28087	Lowndes	MS	Mississippi	1	1	18	59558	12035	0.202	669
28089	Madison	MS	Mississippi	1	1	7	102212	18766	0.184	2681
28091	Marion	MS	Mississippi	1	1	6	25466	5805	0.228	968
28093	Marshall	MS	Mississippi	1	1	0	35981	7858	0.218
28095	Monroe	MS	Mississippi	2	2	9	35967	9309	0.259	1034
28097	Montgomery	MS	Mississippi	1	1	0	10309	2723	0.264
28099	Neshoba	MS	Mississippi	3	3	0	29437	5993	0.204
28101	Newton	MS	Mississippi	0	0	0	21437	4496	0.21
28103	Noxubee	MS	Mississippi	1	1	0	10942	2193	0.2
28105	Oktibbeha	MS	Mississippi	1	1	6	49392	7290	0.148	1215
28107	Panola	MS	Mississippi	1	1	0	34229	7047	0.206
28109	Pearl River	MS	Mississippi	2	2	6	55049	13434	0.244	2239
28111	Perry	MS	Mississippi	0	0	0	12047	2963	0.246
28113	Pike	MS	Mississippi	2	2	28	39763	8664	0.218	309
28115	Pontotoc	MS	Mississippi	1	1	0	31075	6065	0.195
28117	Prentiss	MS	Mississippi	1	1	11	25389	6023	0.237	548
28119	Quitman	MS	Mississippi	0	1	0	7537	1751	0.232
28121	Rankin	MS	Mississippi	4	4	18	149645	29151	0.195	1620
28123	Scott	MS	Mississippi	2	2	0	28399	5665	0.199
28125	Sharkey	MS	Mississippi	1	1	0	4631	994	0.215
28127	Simpson	MS	Mississippi	2	2	0	27215	6069	0.223
28129	Smith	MS	Mississippi	1	1	0	16114	3931	0.244
28131	Stone	MS	Mississippi	1	1	0	17981	3849	0.214
28133	Sunflower	MS	Mississippi	2	2	0	26915	4684	0.174
28135	Tallahatchie	MS	Mississippi	1	1	0	14552	2813	0.193
28137	Tate	MS	Mississippi	1	1	0	28333	5924	0.209
28139	Tippah	MS	Mississippi	1	1	0	21993	4899	0.223
28141	Tishomingo	MS	Mississippi	1	1	0	19476	5209	0.267
28143	Tunica	MS	Mississippi	0	0	0	10276	1747	0.17
28145	Union	MS	Mississippi	1	1	8	28202	6249	0.222	781
28147	Walthall	MS	Mississippi	1	1	0	14670	3582	0.244
28149	Warren	MS	Mississippi	1	1	22	47510	10588	0.223	481
28151	Washington	MS	Mississippi	1	1	22	48002	9825	0.205	447
28153	Wayne	MS	Mississippi	1	1	6	20458	4447	0.217	741
28155	Webster	MS	Mississippi	1	1	0	9868	2204	0.223
28157	Wilkinson	MS	Mississippi	1	1	0	9084	2046	0.225
28159	Winston	MS	Mississippi	1	1	0	18482	4963	0.269
28161	Yalobusha	MS	Mississippi	1	1	0	12426	3373	0.271
28163	Yazoo	MS	Mississippi	1	1	0	27496	4778	0.174
29001	Adair	MO	Missouri	1	1	10	25437	4911	0.193	491
29003	Andrew	MO	Missouri	0	0	0	17358	4296	0.247
29005	Atchison	MO	Missouri	1	1	0	5335	1721	0.323
29007	Audrain	MO	Missouri	1	1	0	25763	6046	0.235
29009	Barry	MO	Missouri	2	2	0	35398	9615	0.272
29011	Barton	MO	Missouri	1	1	4	11942	3000	0.251	750
29013	Bates	MO	Missouri	1	1	0	16405	4245	0.259
29015	Benton	MO	Missouri	0	0	0	18918	7360	0.389
29017	Bollinger	MO	Missouri	0	0	0	12347	3295	0.267
29019	Boone	MO	Missouri	2	2	110	174589	28350	0.162	258
29021	Buchanan	MO	Missouri	1	1	21	89425	18624	0.208	887
29023	Butler	MO	Missouri	2	2	14	42826	10394	0.243	742
29025	Caldwell	MO	Missouri	0	0	0	9046	2392	0.264
29027	Callaway	MO	Missouri	1	1	0	44793	9537	0.213
29029	Camden	MO	Missouri	1	1	18	44855	15571	0.347	865
29031	Cape Girardeau	MO	Missouri	2	2	32	78013	16826	0.216	526
29033	Carroll	MO	Missouri	1	1	0	8909	2477	0.278
29035	Carter	MO	Missouri	0	0	0	6255	1620	0.259
29037	Cass	MO	Missouri	2	2	9	101888	22296	0.219	2477
29039	Cedar	MO	Missouri	1	1	0	13862	3982	0.287
29041	Chariton	MO	Missouri	0	0	0	7586	2288	0.302
29043	Christian	MO	Missouri	0	0	0	83028	16810	0.202
29045	Clark	MO	Missouri	0	0	0	6807	1916	0.281
29047	Clay	MO	Missouri	3	3	172	236068	44493	0.188	259
29049	Clinton	MO	Missouri	1	1	5	20495	4743	0.231	949
29051	Cole	MO	Missouri	2	2	25	76749	16261	0.212	650
29053	Cooper	MO	Missouri	1	1	0	17620	4083	0.232
29055	Crawford	MO	Missouri	0	0	0	24387	5953	0.244
29057	Dade	MO	Missouri	0	0	0	7581	2250	0.297
29059	Dallas	MO	Missouri	0	0	0	16441	4324	0.263
29061	Daviess	MO	Missouri	0	0	0	8300	2185	0.263
29063	DeKalb	MO	Missouri	0	0	0	12564	2717	0.216
29065	Dent	MO	Missouri	1	1	0	15566	4322	0.278
29067	Douglas	MO	Missouri	0	0	0	13391	3895	0.291
29069	Dunklin	MO	Missouri	0	0	0	30905	7240	0.234
29071	Franklin	MO	Missouri	2	2	13	102413	22817	0.223	1755
29073	Gasconade	MO	Missouri	1	1	0	14769	4445	0.301
29075	Gentry	MO	Missouri	1	1	0	6688	1683	0.252
29077	Greene	MO	Missouri	2	2	163	286759	60988	0.213	374
29079	Grundy	MO	Missouri	1	1	0	10111	2793	0.276
29081	Harrison	MO	Missouri	1	1	0	8615	2484	0.288
29083	Henry	MO	Missouri	1	1	8	21834	5958	0.273	745
29085	Hickory	MO	Missouri	0	0	0	9352	3794	0.406
29087	Holt	MO	Missouri	0	0	0	4499	1389	0.309
29089	Howard	MO	Missouri	0	0	0	10144	2395	0.236
29091	Howell	MO	Missouri	2	2	12	40139	9866	0.246	822
29093	Iron	MO	Missouri	1	1	0	10286	2880	0.28
29095	Jackson	MO	Missouri	9	9	274	688554	136794	0.199	499
29097	Jasper	MO	Missouri	3	3	88	118522	23997	0.202	273
29099	Jefferson	MO	Missouri	2	2	67	222639	44346	0.199	662
29101	Johnson	MO	Missouri	1	1	0	53941	8743	0.162
29103	Knox	MO	Missouri	0	0	0	3976	1111	0.279
29105	Laclede	MO	Missouri	1	1	4	35488	8182	0.231	2046
29107	Lafayette	MO	Missouri	1	1	2	32655	8174	0.25	4087
29109	Lawrence	MO	Missouri	1	1	0	38131	9049	0.237
29111	Lewis	MO	Missouri	0	0	0	10078	2396	0.238
29113	Lincoln	MO	Missouri	1	1	4	54800	9951	0.182	2488
29115	Linn	MO	Missouri	1	1	0	12248	3264	0.266
29117	Livingston	MO	Missouri	1	1	0	15025	3870	0.258
29119	McDonald	MO	Missouri	0	0	0	22753	4923	0.216
29121	Macon	MO	Missouri	1	1	0	15319	4479	0.292
29123	Madison	MO	Missouri	1	1	0	12226	3126	0.256
29125	Maries	MO	Missouri	0	0	0	8959	2377	0.265
29127	Marion	MO	Missouri	1	1	8	28703	6636	0.231	830
29129	Mercer	MO	Missouri	0	0	0	3669	1037	0.283
29131	Miller	MO	Missouri	0	0	0	24947	6151	0.247
29133	Mississippi	MO	Missouri	0	0	0	13916	3068	0.22
29135	Moniteau	MO	Missouri	0	0	0	15904	3467	0.218
29137	Monroe	MO	Missouri	0	0	0	8676	2514	0.29
29139	Montgomery	MO	Missouri	0	0	0	11618	3177	0.273
29141	Morgan	MO	Missouri	0	0	0	20097	6188	0.308
29143	New Madrid	MO	Missouri	0	0	0	18030	4377	0.243
29145	Newton	MO	Missouri	1	1	0	58237	13667	0.235
29147	Nodaway	MO	Missouri	1	1	0	22744	4356	0.192
29149	Oregon	MO	Missouri	0	0	0	10779	3347	0.311
29151	Osage	MO	Missouri	0	0	0	13610	3017	0.222
29153	Ozark	MO	Missouri	0	0	0	9328	3114	0.334
29155	Pemiscot	MO	Missouri	1	1	7	17344	3691	0.213	527
29157	Perry	MO	Missouri	1	1	0	19135	4591	0.24
29159	Pettis	MO	Missouri	1	1	9	42309	9293	0.22	1033
29161	Phelps	MO	Missouri	1	1	18	44873	9354	0.208	520
29163	Pike	MO	Missouri	1	1	0	18517	4252	0.23
29165	Platte	MO	Missouri	1	1	0	96899	18623	0.192
29167	Polk	MO	Missouri	1	1	8	31347	7355	0.235	919
29169	Pulaski	MO	Missouri	0	0	0	53132	6246	0.118
29171	Putnam	MO	Missouri	1	1	0	4846	1486	0.307
29173	Ralls	MO	Missouri	0	0	0	10208	2800	0.274
29175	Randolph	MO	Missouri	1	1	8	24987	5586	0.224	698
29177	Ray	MO	Missouri	1	1	0	22859	5551	0.243
29179	Reynolds	MO	Missouri	0	0	0	6361	1916	0.301
29181	Ripley	MO	Missouri	0	0	0	13807	3623	0.262
29183	St. Charles	MO	Missouri	4	4	39	385115	74900	0.194	1921
29185	St. Clair	MO	Missouri	1	1	0	9396	3278	0.349
29186	Ste. Genevieve	MO	Missouri	1	1	0	17882	4593	0.257
29187	St. Francois	MO	Missouri	2	2	10	66248	14643	0.221	1464
29189	St. Louis	MO	Missouri	9	9	468	999539	235062	0.235	502
29195	Saline	MO	Missouri	2	2	7	23010	5380	0.234	769
29197	Schuyler	MO	Missouri	0	0	0	4450	1136	0.255
29199	Scotland	MO	Missouri	1	1	0	4883	1143	0.234
29201	Scott	MO	Missouri	1	1	12	38858	9126	0.235	761
29203	Shannon	MO	Missouri	0	0	0	8273	2279	0.275
29205	Shelby	MO	Missouri	0	0	0	6084	1705	0.28
29207	Stoddard	MO	Missouri	1	1	4	29634	7527	0.254	1882
29209	Stone	MO	Missouri	0	0	0	31529	12153	0.385
29211	Sullivan	MO	Missouri	1	1	0	6382	1620	0.254
29213	Taney	MO	Missouri	1	1	18	54308	14724	0.271	818
29215	Texas	MO	Missouri	1	1	4	25714	6773	0.263	1693
29217	Vernon	MO	Missouri	1	1	6	20665	5056	0.245	843
29219	Warren	MO	Missouri	0	0	0	33554	8041	0.24
29221	Washington	MO	Missouri	1	1	0	24968	5493	0.22
29223	Wayne	MO	Missouri	0	0	0	13369	3895	0.291
29225	Webster	MO	Missouri	0	0	0	37558	7556	0.201
29227	Worth	MO	Missouri	0	0	0	2053	630	0.307
29229	Wright	MO	Missouri	0	0	0	18304	4787	0.262
29510	St. Louis City	MO	Missouri	3	3	207	314867	57543	0.183	278
30001	Beaverhead	MT	Montana	1	1	0	9360	2739	0.293
30003	Big Horn	MT	Montana	2	2	0	13290	2252	0.169
30005	Blaine	MT	Montana	1	1	0	6646	1338	0.201
30007	Broadwater	MT	Montana	1	1	0	5755	1828	0.318
30009	Carbon	MT	Montana	1	1	0	10466	3544	0.339
30011	Carter	MT	Montana	1	1	0	1320	457	0.346
30013	Cascade	MT	Montana	2	2	20	81816	19330	0.236	967
30015	Chouteau	MT	Montana	2	2	0	5812	1617	0.278
30017	Custer	MT	Montana	1	1	4	11895	3032	0.255	758
30019	Daniels	MT	Montana	1	1	0	1788	529	0.296
30021	Dawson	MT	Montana	1	1	3	9324	2324	0.249	775
30023	Deer Lodge	MT	Montana	1	1	0	9131	2878	0.315
30025	Fallon	MT	Montana	1	1	0	2925	737	0.252
30027	Fergus	MT	Montana	1	1	0	11327	3317	0.293
30029	Flathead	MT	Montana	3	3	22	96147	24545	0.255	1116
30031	Gallatin	MT	Montana	2	2	8	100733	17127	0.17	2141
30033	Garfield	MT	Montana	1	1	0	1086	310	0.285
30035	Glacier	MT	Montana	2	2	0	13677	2288	0.167
30037	Golden Valley	MT	Montana	0	0	0	747	281	0.376
30039	Granite	MT	Montana	1	1	0	3206	1229	0.383
30041	Hill	MT	Montana	1	1	6	16468	3176	0.193	529
30043	Jefferson	MT	Montana	0	0	0	11625	3437	0.296
30045	Judith Basin	MT	Montana	0	0	0	1965	630	0.321
30047	Lake	MT	Montana	2	2	0	29518	8372	0.284
30049	Lewis and Clark	MT	Montana	1	1	8	66290	16327	0.246	2041
30051	Liberty	MT	Montana	1	1	0	2245	724	0.322
30053	Lincoln	MT	Montana	1	1	0	19249	7031	0.365
30055	McCone	MT	Montana	1	1	0	1728	550	0.318
30057	Madison	MT	Montana	2	2	0	7902	3066	0.388
30059	Meagher	MT	Montana	1	1	0	2000	578	0.289
30061	Mineral	MT	Montana	1	1	0	4194	1542	0.368
30063	Missoula	MT	Montana	2	2	32	114231	22759	0.199	711
30065	Musselshell	MT	Montana	1	1	0	4766	1594	0.334
30067	Park	MT	Montana	1	1	4	16001	4577	0.286	1144
30069	Petroleum	MT	Montana	0	0	0	453	141	0.311
30071	Phillips	MT	Montana	1	1	0	4139	1155	0.279
30073	Pondera	MT	Montana	1	1	0	6081	1684	0.277
30075	Powder River	MT	Montana	0	0	0	1610	534	0.332
30077	Powell	MT	Montana	1	1	0	6852	1842	0.269
30079	Prairie	MT	Montana	1	1	0	1325	462	0.349
30081	Ravalli	MT	Montana	1	1	5	41387	13513	0.327	2703
30083	Richland	MT	Montana	1	1	0	11405	2372	0.208
30085	Roosevelt	MT	Montana	3	3	0	11218	1796	0.16
30087	Rosebud	MT	Montana	1	1	1	9292	1891	0.204	1891
30089	Sanders	MT	Montana	1	1	0	11414	4282	0.375
30091	Sheridan	MT	Montana	1	1	0	3568	1075	0.301
30093	Silver Bow	MT	Montana	1	1	11	34514	8536	0.247	776
30095	Stillwater	MT	Montana	1	1	0	9342	2685	0.287
30097	Sweet Grass	MT	Montana	1	1	0	3646	1290	0.354
30099	Teton	MT	Montana	1	1	0	6040	1756	0.291
30101	Toole	MT	Montana	1	1	0	5031	1261	0.251
30103	Treasure	MT	Montana	0	0	0	790	262	0.332
30105	Valley	MT	Montana	1	1	0	7561	2163	0.286
30107	Wheatland	MT	Montana	1	1	0	2108	537	0.255
30109	Wibaux	MT	Montana	0	0	0	1121	380	0.339
30111	Yellowstone	MT	Montana	2	2	41	156332	34804	0.223	849
31001	Adams	NE	Nebraska	1	1	10	31564	7465	0.237	747
31003	Antelope	NE	Nebraska	1	1	0	6406	1958	0.306
31005	Arthur	NE	Nebraska	0	0	0	421	112	0.266
31007	Banner	NE	Nebraska	0	0	0	728	184	0.253
31009	Blaine	NE	Nebraska	0	0	0	502	164	0.327
31011	Boone	NE	Nebraska	1	1	0	5357	1632	0.305
31013	Box Butte	NE	Nebraska	1	1	0	11200	2881	0.257
31015	Boyd	NE	Nebraska	1	1	0	2049	704	0.344
31017	Brown	NE	Nebraska	1	1	0	3058	1042	0.341
31019	Buffalo	NE	Nebraska	2	2	34	48834	9288	0.19	273
31021	Burt	NE	Nebraska	1	1	0	6546	2059	0.315
31023	Butler	NE	Nebraska	1	1	0	8105	2184	0.269
31025	Cass	NE	Nebraska	0	0	0	25513	5904	0.231
31027	Cedar	NE	Nebraska	0	0	0	8561	2423	0.283
31029	Chase	NE	Nebraska	1	1	0	3803	1112	0.292
31031	Cherry	NE	Nebraska	1	1	0	5792	1699	0.293
31033	Cheyenne	NE	Nebraska	1	1	4	10012	2396	0.239	599
31035	Clay	NE	Nebraska	0	0	0	6264	1617	0.258
31037	Colfax	NE	Nebraska	1	1	0	10616	1928	0.182
31039	Cuming	NE	Nebraska	1	1	0	9039	2467	0.273
31041	Custer	NE	Nebraska	2	2	0	10836	3058	0.282
31043	Dakota	NE	Nebraska	0	0	0	20529	3746	0.182
31045	Dawes	NE	Nebraska	1	1	0	8972	2181	0.243
31047	Dawson	NE	Nebraska	3	3	0	23925	4804	0.201
31049	Deuel	NE	Nebraska	0	0	0	1901	600	0.316
31051	Dixon	NE	Nebraska	0	0	0	5765	1552	0.269
31053	Dodge	NE	Nebraska	1	1	0	36576	9091	0.249
31055	Douglas	NE	Nebraska	8	8	187	549706	95539	0.174	511
31057	Dundy	NE	Nebraska	1	1	0	2017	546	0.271
31059	Fillmore	NE	Nebraska	1	1	0	5603	1687	0.301
31061	Franklin	NE	Nebraska	1	1	0	3019	1067	0.353
31063	Frontier	NE	Nebraska	0	0	0	2624	840	0.32
31065	Furnas	NE	Nebraska	1	1	0	4814	1514	0.314
31067	Gage	NE	Nebraska	1	1	3	21632	5923	0.274	1974
31069	Garden	NE	Nebraska	1	1	0	1913	650	0.34
31071	Garfield	NE	Nebraska	0	0	0	1958	734	0.375
31073	Gosper	NE	Nebraska	0	0	0	2019	614	0.304
31075	Grant	NE	Nebraska	0	0	0	682	213	0.312
31077	Greeley	NE	Nebraska	0	0	0	2436	760	0.312
31079	Hall	NE	Nebraska	1	1	16	61233	11885	0.194	743
31081	Hamilton	NE	Nebraska	1	1	0	9149	2394	0.262
31083	Harlan	NE	Nebraska	1	1	0	3469	1149	0.331
31085	Hayes	NE	Nebraska	0	0	0	957	294	0.307
31087	Hitchcock	NE	Nebraska	0	0	0	2860	867	0.303
31089	Holt	NE	Nebraska	3	3	0	10293	2986	0.29
31091	Hooker	NE	Nebraska	0	0	0	684	316	0.462
31093	Howard	NE	Nebraska	1	1	0	6385	1788	0.28
31095	Jefferson	NE	Nebraska	1	1	0	7276	2404	0.33
31097	Johnson	NE	Nebraska	1	1	0	5200	1335	0.257
31099	Kearney	NE	Nebraska	1	1	0	6547	1735	0.265
31101	Keith	NE	Nebraska	1	1	0	8129	2712	0.334
31103	Keya Paha	NE	Nebraska	0	0	0	720	230	0.319
31105	Kimball	NE	Nebraska	1	1	0	3688	1160	0.315
31107	Knox	NE	Nebraska	1	1	0	8496	2628	0.309
31109	Lancaster	NE	Nebraska	4	4	108	306357	55100	0.18	510
31111	Lincoln	NE	Nebraska	1	1	19	35569	8746	0.246	460
31113	Logan	NE	Nebraska	0	0	0	919	229	0.249
31115	Loup	NE	Nebraska	0	0	0	537	172	0.32
31117	McPherson	NE	Nebraska	0	0	0	432	115	0.266
31119	Madison	NE	Nebraska	1	1	24	35062	7213	0.206	301
31121	Merrick	NE	Nebraska	1	1	0	7829	2144	0.274
31123	Morrill	NE	Nebraska	1	1	0	4903	1322	0.27
31125	Nance	NE	Nebraska	0	0	0	3569	1046	0.293
31127	Nemaha	NE	Nebraska	1	1	0	7041	1894	0.269
31129	Nuckolls	NE	Nebraska	1	1	0	4318	1511	0.35
31131	Otoe	NE	Nebraska	2	2	0	15875	4084	0.257
31133	Pawnee	NE	Nebraska	1	1	0	2704	885	0.327
31135	Perkins	NE	Nebraska	1	1	0	2904	883	0.304
31137	Phelps	NE	Nebraska	1	1	0	9163	2410	0.263
31139	Pierce	NE	Nebraska	2	2	0	7175	1814	0.253
31141	Platte	NE	Nebraska	2	2	5	32875	7783	0.237	1557
31143	Polk	NE	Nebraska	1	1	0	5244	1551	0.296
31145	Red Willow	NE	Nebraska	1	1	0	10870	2755	0.253
31147	Richardson	NE	Nebraska	1	1	0	8045	2480	0.308
31149	Rock	NE	Nebraska	0	0	0	1381	505	0.366
31151	Saline	NE	Nebraska	2	2	0	14325	2883	0.201
31153	Sarpy	NE	Nebraska	2	2	8	175188	26946	0.154	3368
31155	Saunders	NE	Nebraska	1	1	0	20953	5028	0.24
31157	Scotts Bluff	NE	Nebraska	1	1	22	36509	9022	0.247	410
31159	Seward	NE	Nebraska	1	1	0	17045	3968	0.233
31161	Sheridan	NE	Nebraska	1	1	0	5241	1703	0.325
31163	Sherman	NE	Nebraska	0	0	0	3048	1003	0.329
31165	Sioux	NE	Nebraska	0	0	0	1256	415	0.33
31167	Stanton	NE	Nebraska	0	0	0	6020	1401	0.233
31169	Thayer	NE	Nebraska	1	1	0	5133	1792	0.349
31171	Thomas	NE	Nebraska	0	0	0	643	195	0.303
31173	Thurston	NE	Nebraska	1	1	0	7055	1213	0.172
31175	Valley	NE	Nebraska	1	1	0	4252	1353	0.318
31177	Washington	NE	Nebraska	1	1	0	20414	4635	0.227
31179	Wayne	NE	Nebraska	1	1	0	9409	1963	0.209
31181	Webster	NE	Nebraska	1	1	0	3597	1110	0.309
31183	Wheeler	NE	Nebraska	0	0	0	846	289	0.342
31185	York	NE	Nebraska	2	2	0	13832	3577	0.259
32001	Churchill	NV	Nevada	1	1	0	24022	5694	0.237
32003	Clark	NV	Nevada	18	19	535	2112436	405618	0.192	758
32005	Douglas	NV	Nevada	1	1	0	47632	16331	0.343
32007	Elko	NV	Nevada	1	1	7	52377	8008	0.153	1144
32009	Esmeralda	NV	Nevada	0	0	0	1102	386	0.35
32011	Eureka	NV	Nevada	0	0	0	1728	452	0.262
32013	Humboldt	NV	Nevada	1	1	3	17088	3163	0.185	1054
32015	Lander	NV	Nevada	1	1	0	5887	1155	0.196
32017	Lincoln	NV	Nevada	1	1	0	5203	1418	0.273
32019	Lyon	NV	Nevada	1	1	0	52303	14565	0.278
32021	Mineral	NV	Nevada	1	1	0	4471	1341	0.3
32023	Nye	NV	Nevada	1	1	0	43296	15960	0.369
32027	Pershing	NV	Nevada	1	1	0	6661	1468	0.22
32029	Storey	NV	Nevada	0	0	0	3891	1510	0.388
32031	Washoe	NV	Nevada	5	5	331	445551	95558	0.214	289
32033	White Pine	NV	Nevada	1	1	0	9858	2291	0.232
32510	Carson City	NV	Nevada	1	1	24	54219	14410	0.266	600
33001	Belknap	NH	New Hampshire	1	1	10	60383	17260	0.286	1726
33003	Carroll	NH	New Hampshire	2	2	8	47524	16281	0.343	2035
33005	Cheshire	NH	New Hampshire	1	1	27	76109	19389	0.255	718
33007	Coos	NH	New Hampshire	3	3	3	32119	9795	0.305	3265
33009	Grafton	NH	New Hampshire	5	5	54	89280	23734	0.266	440
33011	Hillsborough	NH	New Hampshire	5	5	62	406371	84563	0.208	1364
33013	Merrimack	NH	New Hampshire	3	3	18	147958	34833	0.235	1935
33015	Rockingham	NH	New Hampshire	3	3	43	302479	69798	0.231	1623
33017	Strafford	NH	New Hampshire	2	2	17	126552	25034	0.198	1473
33019	Sullivan	NH	New Hampshire	1	1	0	43073	11885	0.276
34001	Atlantic	NJ	New Jersey	2	2	64	272926	62613	0.229	978
34003	Bergen	NJ	New Jersey	6	6	147	937920	211672	0.226	1440
34005	Burlington	NJ	New Jersey	3	3	82	449192	98530	0.219	1202
34007	Camden	NJ	New Jersey	4	4	199	510996	104370	0.204	524
34009	Cape May	NJ	New Jersey	1	1	16	94549	31925	0.338	1995
34011	Cumberland	NJ	New Jersey	1	1	36	154952	30141	0.195	837
34013	Essex	NJ	New Jersey	7	7	267	800401	146732	0.183	550
34015	Gloucester	NJ	New Jersey	1	1	14	291372	60833	0.209	4345
34017	Hudson	NJ	New Jersey	6	6	105	679756	109974	0.162	1047
34019	Hunterdon	NJ	New Jersey	1	1	12	125717	30279	0.241	2523
34021	Mercer	NJ	New Jersey	4	4	92	373362	75299	0.202	818
34023	Middlesex	NJ	New Jersey	5	5	185	837288	164627	0.197	890
34025	Monmouth	NJ	New Jersey	5	5	152	627551	142622	0.227	938
34027	Morris	NJ	New Jersey	3	3	91	498847	110520	0.222	1215
34029	Ocean	NJ	New Jersey	4	4	106	589699	167321	0.284	1579
34031	Passaic	NJ	New Jersey	2	2	97	510563	98279	0.192	1013
34033	Salem	NJ	New Jersey	2	2	19	63776	15640	0.245	823
34035	Somerset	NJ	New Jersey	1	1	28	333316	67698	0.203	2418
34037	Sussex	NJ	New Jersey	1	1	10	143570	32694	0.228	3269
34039	Union	NJ	New Jersey	3	3	80	557320	106249	0.191	1328
34041	Warren	NJ	New Jersey	2	2	20	107088	24579	0.23	1229
35001	Bernalillo	NM	New Mexico	5	5	138	674855	140933	0.209	1021
35003	Catron	NM	New Mexico	0	0	0	3547	1793	0.505
35005	Chaves	NM	New Mexico	2	2	24	65454	13924	0.213	580
35006	Cibola	NM	New Mexico	2	2	4	27049	5804	0.215	1451
35007	Colfax	NM	New Mexico	1	1	4	12522	4281	0.342	1070
35009	Curry	NM	New Mexico	1	1	8	50283	8363	0.166	1045
35011	De Baca	NM	New Mexico	0	0	0	2016	480	0.238
35013	Dona Ana	NM	New Mexico	2	2	51	213849	41981	0.196	823
35015	Eddy	NM	New Mexico	2	2	12	56793	11808	0.208	984
35017	Grant	NM	New Mexico	1	1	6	28382	9026	0.318	1504
35019	Guadalupe	NM	New Mexico	1	1	0	4426	1149	0.26
35021	Harding	NM	New Mexico	0	0	0	546	259	0.474
35023	Hidalgo	NM	New Mexico	0	0	0	4446	1233	0.277
35025	Lea	NM	New Mexico	2	2	8	69505	10775	0.155	1347
35027	Lincoln	NM	New Mexico	1	1	4	19497	6880	0.353	1720
35028	Los Alamos	NM	New Mexico	1	1	6	18031	4309	0.239	718
35029	Luna	NM	New Mexico	1	1	6	24319	6445	0.265	1074
35031	McKinley	NM	New Mexico	4	4	5	72849	11923	0.164	2385
35033	Mora	NM	New Mexico	0	0	0	4605	1391	0.302
35035	Otero	NM	New Mexico	2	2	10	65130	14360	0.22	1436
35037	Quay	NM	New Mexico	1	1	0	8447	2671	0.316
35039	Rio Arriba	NM	New Mexico	1	1	8	39455	9932	0.252	1242
35041	Roosevelt	NM	New Mexico	1	1	0	19313	3425	0.177
35043	Sandoval	NM	New Mexico	1	1	0	138815	30925	0.223
35045	San Juan	NM	New Mexico	2	2	10	128221	23922	0.187	2392
35047	San Miguel	NM	New Mexico	1	1	8	28203	7333	0.26	917
35049	Santa Fe	NM	New Mexico	3	3	22	147514	42681	0.289	1940
35051	Sierra	NM	New Mexico	1	1	0	11254	4961	0.441
35053	Socorro	NM	New Mexico	1	1	0	17098	4106	0.24
35055	Taos	NM	New Mexico	1	1	6	32809	10333	0.315	1722
35057	Torrance	NM	New Mexico	0	0	0	15534	4251	0.274
35059	Union	NM	New Mexico	1	1	0	4216	1032	0.245
35061	Valencia	NM	New Mexico	0	0	0	75845	17086	0.225
36001	Albany	NY	New York	3	3	120	308580	67673	0.219	564
36003	Allegany	NY	New York	2	2	6	47400	11338	0.239	1890
36005	Bronx	NY	New York	6	6	270	1455846	243010	0.167	900
36007	Broome	NY	New York	2	2	47	196124	47891	0.244	1019
36009	Cattaraugus	NY	New York	1	1	0	78175	19443	0.249
36011	Cayuga	NY	New York	1	1	14	78319	19140	0.244	1367
36013	Chautauqua	NY	New York	3	3	26	130846	33458	0.256	1287
36015	Chemung	NY	New York	2	2	20	86883	21007	0.242	1050
36017	Chenango	NY	New York	1	1	7	48763	12688	0.26	1813
36019	Clinton	NY	New York	1	1	21	81224	17868	0.22	851
36021	Columbia	NY	New York	1	1	9	61481	18429	0.3	2048
36023	Cortland	NY	New York	1	1	12	48334	10162	0.21	847
36025	Delaware	NY	New York	3	3	0	45950	14201	0.309
36027	Dutchess	NY	New York	2	2	51	295685	66971	0.226	1313
36029	Erie	NY	New York	6	6	262	923995	216391	0.234	826
36031	Essex	NY	New York	1	1	0	38233	11100	0.29
36033	Franklin	NY	New York	2	2	13	51054	11559	0.226	889
36035	Fulton	NY	New York	1	1	8	53955	13782	0.255	1723
36037	Genesee	NY	New York	1	1	10	58537	13935	0.238	1394
36039	Greene	NY	New York	0	0	0	47791	13422	0.281
36041	Hamilton	NY	New York	0	0	0	4646	1721	0.37
36043	Herkimer	NY	New York	1	1	0	62943	16310	0.259
36045	Jefferson	NY	New York	3	3	10	116567	19760	0.17	1976
36047	Kings	NY	New York	12	12	318	2635121	476741	0.181	1499
36049	Lewis	NY	New York	1	1	6	26845	6305	0.235	1051
36051	Livingston	NY	New York	1	1	0	64373	14878	0.231
36053	Madison	NY	New York	2	2	6	71760	16941	0.236	2824
36055	Monroe	NY	New York	5	5	191	748680	166403	0.222	871
36057	Montgomery	NY	New York	1	1	8	49500	11948	0.241	1494
36059	Nassau	NY	New York	10	10	461	1363069	318040	0.233	690
36061	New York	NY	New York	12	12	761	1653877	344283	0.208	452
36063	Niagara	NY	New York	3	3	32	212675	52917	0.249	1654
36065	Oneida	NY	New York	3	3	51	232324	56184	0.242	1102
36067	Onondaga	NY	New York	3	3	152	467669	103054	0.22	678
36069	Ontario	NY	New York	3	3	27	109491	27978	0.256	1036
36071	Orange	NY	New York	4	4	76	378174	70347	0.186	926
36073	Orleans	NY	New York	1	1	0	41584	9631	0.232
36075	Oswego	NY	New York	1	1	8	119833	25826	0.216	3228
36077	Otsego	NY	New York	2	2	14	60750	16165	0.266	1155
36079	Putnam	NY	New York	1	1	10	99464	22683	0.228	2268
36081	Queens	NY	New York	6	6	129	2339280	470619	0.201	3648
36083	Rensselaer	NY	New York	3	3	12	159800	35905	0.225	2992
36085	Richmond	NY	New York	2	2	114	475948	101941	0.214	894
36087	Rockland	NY	New York	3	3	39	325027	66379	0.204	1702
36089	St. Lawrence	NY	New York	5	5	20	110817	24432	0.22	1222
36091	Saratoga	NY	New York	1	1	19	226632	52232	0.23	2749
36093	Schenectady	NY	New York	2	2	36	155239	34957	0.225	971
36095	Schoharie	NY	New York	1	1	0	31611	8559	0.271
36097	Schuyler	NY	New York	1	1	0	18112	4831	0.267
36099	Seneca	NY	New York	0	0	0	34843	8362	0.24
36101	Steuben	NY	New York	3	3	8	97539	24270	0.249	3034
36103	Suffolk	NY	New York	10	10	281	1497595	326104	0.218	1161
36105	Sullivan	NY	New York	2	2	10	75783	18426	0.243	1843
36107	Tioga	NY	New York	0	0	0	49322	12444	0.252
36109	Tompkins	NY	New York	1	1	16	104415	18998	0.182	1187
36111	Ulster	NY	New York	3	3	25	180129	45203	0.251	1808
36113	Warren	NY	New York	1	1	24	64701	17940	0.277	748
36115	Washington	NY	New York	0	0	0	62183	15438	0.248
36117	Wayne	NY	New York	1	1	8	91442	22194	0.243	2774
36119	Westchester	NY	New York	9	9	179	975321	214443	0.22	1198
36121	Wyoming	NY	New York	1	1	5	40886	9523	0.233	1905
36123	Yates	NY	New York	1	1	0	25083	6750	0.269
37001	Alamance	NC	North Carolina	1	1	20	157844	35388	0.224	1769
37003	Alexander	NC	North Carolina	0	0	0	37159	9162	0.247
37005	Alleghany	NC	North Carolina	1	1	0	10935	3618	0.331
37007	Anson	NC	North Carolina	1	1	0	25531	5848	0.229
37009	Ashe	NC	North Carolina	1	1	0	26833	8552	0.319
37011	Avery	NC	North Carolina	1	1	0	17535	4821	0.275
37013	Beaufort	NC	North Carolina	1	1	8	47316	14046	0.297	1756
37015	Bertie	NC	North Carolina	1	1	0	19913	5537	0.278
37017	Bladen	NC	North Carolina	1	1	4	34130	9534	0.279	2384
37019	Brunswick	NC	North Carolina	2	2	19	122586	46285	0.378	2436
37021	Buncombe	NC	North Carolina	1	1	166	252268	64710	0.257	390
37023	Burke	NC	North Carolina	1	1	16	88898	23258	0.262	1454
37025	Cabarrus	NC	North Carolina	1	1	25	196716	35521	0.181	1421
37027	Caldwell	NC	North Carolina	1	1	12	81805	20816	0.254	1735
37029	Camden	NC	North Carolina	0	0	0	10336	2164	0.209
37031	Carteret	NC	North Carolina	1	1	8	68699	21116	0.307	2640
37033	Caswell	NC	North Carolina	0	0	0	22833	6116	0.268
37035	Catawba	NC	North Carolina	2	2	52	156182	35455	0.227	682
37037	Chatham	NC	North Carolina	1	1	4	68364	20511	0.3	5128
37039	Cherokee	NC	North Carolina	1	1	0	27463	9952	0.362
37041	Chowan	NC	North Carolina	1	1	4	14370	4452	0.31	1113
37043	Clay	NC	North Carolina	0	0	0	10753	4115	0.383
37045	Cleveland	NC	North Carolina	2	2	57	97038	23687	0.244	416
37047	Columbus	NC	North Carolina	1	1	10	56589	14110	0.249	1411
37049	Craven	NC	North Carolina	1	1	72	103374	24450	0.237	340
37051	Cumberland	NC	North Carolina	1	1	48	332766	52166	0.157	1087
37053	Currituck	NC	North Carolina	0	0	0	25247	5686	0.225
37055	Dare	NC	North Carolina	1	1	0	35412	9885	0.279
37057	Davidson	NC	North Carolina	2	2	29	164118	37797	0.23	1303
37059	Davie	NC	North Carolina	1	1	0	41766	11078	0.265
37061	Duplin	NC	North Carolina	1	1	9	59350	13785	0.232	1532
37063	Durham	NC	North Carolina	3	3	148	300865	51648	0.172	349
37065	Edgecombe	NC	North Carolina	1	1	15	54032	13212	0.245	881
37067	Forsyth	NC	North Carolina	3	3	259	368362	76042	0.206	294
37069	Franklin	NC	North Carolina	0	0	0	63866	14275	0.224
37071	Gaston	NC	North Carolina	1	1	74	214049	46215	0.216	625
37073	Gates	NC	North Carolina	0	0	0	11601	2897	0.25
37075	Graham	NC	North Carolina	0	0	0	8607	2550	0.296
37077	Granville	NC	North Carolina	1	1	6	58503	13167	0.225	2195
37079	Greene	NC	North Carolina	0	0	0	21059	4490	0.213
37081	Guilford	NC	North Carolina	2	2	142	517197	102558	0.198	722
37083	Halifax	NC	North Carolina	2	2	16	52300	13866	0.265	867
37085	Harnett	NC	North Carolina	1	1	14	128753	21027	0.163	1502
37087	Haywood	NC	North Carolina	1	1	12	59854	18819	0.314	1568
37089	Henderson	NC	North Carolina	2	2	27	112156	35451	0.316	1313
37091	Hertford	NC	North Carolina	1	1	10	24262	6311	0.26	631
37093	Hoke	NC	North Carolina	1	1	0	52571	7093	0.135
37095	Hyde	NC	North Carolina	0	0	0	5507	1276	0.232
37097	Iredell	NC	North Carolina	3	3	36	169798	34692	0.204	964
37099	Jackson	NC	North Carolina	1	1	9	41725	10654	0.255	1184
37101	Johnston	NC	North Carolina	1	1	24	186308	33619	0.18	1401
37103	Jones	NC	North Carolina	0	0	0	9776	2653	0.271
37105	Lee	NC	North Carolina	1	1	8	59805	12481	0.209	1560
37107	Lenoir	NC	North Carolina	1	1	14	57934	14708	0.254	1051
37109	Lincoln	NC	North Carolina	1	1	10	80504	18644	0.232	1864
37111	McDowell	NC	North Carolina	1	1	9	45069	11491	0.255	1277
37113	Macon	NC	North Carolina	2	2	5	34160	12106	0.354	2421
37115	Madison	NC	North Carolina	0	0	0	21347	6084	0.285
37117	Martin	NC	North Carolina	1	1	6	23227	6835	0.294	1139
37119	Mecklenburg	NC	North Carolina	7	7	173	1034290	156489	0.151	905
37121	Mitchell	NC	North Carolina	1	1	0	15155	4846	0.32
37123	Montgomery	NC	North Carolina	1	1	0	27445	7131	0.26
37125	Moore	NC	North Carolina	1	1	68	94191	28522	0.303	419
37127	Nash	NC	North Carolina	1	1	21	94125	22363	0.238	1065
37129	New Hanover	NC	North Carolina	2	2	57	219866	48907	0.222	858
37131	Northampton	NC	North Carolina	0	0	0	20426	6480	0.317
37133	Onslow	NC	North Carolina	1	1	14	192685	22983	0.119	1642
37135	Orange	NC	North Carolina	1	1	13	141812	25896	0.183	1992
37137	Pamlico	NC	North Carolina	0	0	0	12803	4684	0.366
37139	Pasquotank	NC	North Carolina	1	1	10	39546	8584	0.217	858
37141	Pender	NC	North Carolina	1	1	0	57630	13694	0.238
37143	Perquimans	NC	North Carolina	0	0	0	13506	4652	0.344
37145	Person	NC	North Carolina	1	1	6	39240	9982	0.254	1664
37147	Pitt	NC	North Carolina	1	1	71	176484	30269	0.172	426
37149	Polk	NC	North Carolina	1	1	6	20434	7657	0.375	1276
37151	Randolph	NC	North Carolina	1	1	12	142827	32782	0.23	2732
37153	Richmond	NC	North Carolina	0	0	0	45447	10922	0.24
37155	Robeson	NC	North Carolina	1	1	25	134187	26448	0.197	1058
37157	Rockingham	NC	North Carolina	1	1	9	91566	24175	0.264	2686
37159	Rowan	NC	North Carolina	1	1	20	138940	31195	0.225	1560
37161	Rutherford	NC	North Carolina	1	1	18	66523	18012	0.271	1001
37163	Sampson	NC	North Carolina	1	1	8	63664	14291	0.224	1786
37165	Scotland	NC	North Carolina	1	1	8	35445	8246	0.233	1031
37167	Stanly	NC	North Carolina	1	1	10	60875	14861	0.244	1486
37169	Stokes	NC	North Carolina	1	1	0	46124	12165	0.264
37171	Surry	NC	North Carolina	2	2	10	72315	18749	0.259	1875
37173	Swain	NC	North Carolina	2	2	0	14208	3584	0.252
37175	Transylvania	NC	North Carolina	1	1	4	33291	12332	0.37	3083
37177	Tyrrell	NC	North Carolina	0	0	0	4090	1372	0.335
37179	Union	NC	North Carolina	1	1	14	222095	36152	0.163	2582
37181	Vance	NC	North Carolina	1	1	20	44420	10563	0.238	528
37183	Wake	NC	North Carolina	4	4	175	1023811	157546	0.154	900
37185	Warren	NC	North Carolina	0	0	0	20190	6367	0.315
37187	Washington	NC	North Carolina	1	1	0	12331	3689	0.299
37189	Watauga	NC	North Carolina	1	1	10	53421	11059	0.207	1106
37191	Wayne	NC	North Carolina	1	1	16	124496	26321	0.211	1645
37193	Wilkes	NC	North Carolina	1	1	8	68525	18236	0.266	2280
37195	Wilson	NC	North Carolina	1	1	14	81379	19331	0.238	1381
37197	Yadkin	NC	North Carolina	0	0	0	37825	9707	0.257
37199	Yancey	NC	North Carolina	0	0	0	17605	5605	0.318
38001	Adams	ND	North Dakota	1	1	0	2368	743	0.314
38003	Barnes	ND	North Dakota	1	1	0	10971	3118	0.284
38005	Benson	ND	North Dakota	0	0	0	6875	1327	0.193
38007	Billings	ND	North Dakota	0	0	0	983	250	0.254
38009	Bottineau	ND	North Dakota	1	1	0	6651	2058	0.309
38011	Bowman	ND	North Dakota	1	1	0	3226	933	0.289
38013	Burke	ND	North Dakota	0	0	0	2253	513	0.228
38015	Burleigh	ND	North Dakota	2	2	72	92372	18957	0.205	263
38017	Cass	ND	North Dakota	2	2	111	170620	27710	0.162	250
[truncated: 1,143 more rows]
